# Supplementary material
Source: PubMed Central journal article supplement (PMC5116725)
Supplement: IAI.00584-16_zii999091894so1.pdf [file IAI.00584-16_zii999091894so1.pdf]

**Table S1: Proteome analysis of *N. meningitidis* MC58 grown at 32°C and 37°C.** Entries are organized hierarchically by localization (as annotated or predicted). overall significance level groups as assessed by Student's T-test ( $P < 0.01$ . dark grey;  $P = 0.01$  to  $0.05$ . light gray;  $P > 0.05$ . white) and amplitude of differential regulation (ratio 32°C/37°C).

| GI       | protein* | name / function*                                                  | (predicted) localization** | 32°C           |                |                |        | 37°C           |                |                |       | ratio 32°C/37°C | P-value (T-test) |
|----------|----------|-------------------------------------------------------------------|----------------------------|----------------|----------------|----------------|--------|----------------|----------------|----------------|-------|-----------------|------------------|
|          |          |                                                                   |                            | A <sup>#</sup> | B <sup>#</sup> | C <sup>#</sup> | mean   | A <sup>#</sup> | B <sup>#</sup> | C <sup>#</sup> | mean  |                 |                  |
| 7227358  | NMB2095  | putative adhesin complex protein. ACP                             | outer membrane             | 1.013          | 0.964          | 1.246          | 1.075  | 0.233          | 0.227          | 0.317          | 0.259 | 4.150           | 0.0051           |
| 7226579  | NMB1335  | creA protein                                                      | outer membrane             | 0.819          | 0.879          | 1.100          | 0.933  | 0.470          | 0.597          | 0.801          | 0.623 | 1.498           | 0.0041           |
| 7226778  | NMB1533  | H.8 outer membrane protein                                        | outer membrane             | 1.247          | 1.357          | 1.185          | 1.263  | 0.870          | 1.025          | 0.878          | 0.924 | 1.366           | 0.0037           |
| 7226166  | NMB0928  | outer membrane protein assembly protein BamC                      | outer membrane             | 0.577          | 0.688          | 0.635          | 0.633  | 0.723          | 0.853          | 0.787          | 0.788 | 0.804           | 0.0013           |
| 7225603  | NMB0382  | outer membrane protein class 4. RmpM                              | outer membrane             | 0.709          | 1.076          | 0.507          | 0.764  | 1.083          | 1.387          | 0.805          | 1.092 | 0.700           | 0.0050           |
| 7225687  | NMB0461  | transferrin-binding protein 1 TbpA                                | outer membrane             | 0.308          | 0.375          | 0.270          | 0.318  | 0.518          | 0.609          | 0.543          | 0.557 | 0.571           | 0.0059           |
| 7227230  | NMB1969  | autotransported serine protease NalP                              | outer membrane             | 0.806          | 1.018          | 0.919          | 0.914  | 1.538          | 1.996          | 1.742          | 1.758 | 0.520           | 0.0072           |
| 7413447  | NMB0964  | TonB dependent receptor. ZnuD                                     | outer membrane             | 0.410          | 0.058          | 0.749          | 0.406  | 0.913          | 0.613          | 1.253          | 0.927 | 0.438           | 0.0011           |
| 7227388  | NMB2132  | Neisseria heparin binding antigen. NHBA                           | outer membrane             | -              | 14.558         | 13.664         | 14.111 | 1.225          | 1.408          | 1.837          | 1.490 | 9.470           | 0.0337           |
| 7225291  | NMB0071  | polysialic acid capsule export outer-membrane lipoprotein CtrA    | outer membrane             | 25.396         | 27.661         | 35.076         | 29.378 | 9.289          | 10.092         | 8.452          | 9.278 | 3.166           | 0.0257           |
| 7227353  | NMB2091  | BAM complex accessory protein                                     | outer membrane             | 1.436          | 1.513          | 1.445          | 1.465  | 0.870          | -              | 0.932          | 0.901 | 1.626           | 0.0313           |
| 7226815  | NMB1567  | probable FKBP-type peptidyl-prolyl cis-trans isomerase FkpA (MIP) | outer membrane             | 0.383          | 0.446          | 0.370          | 0.400  | 0.320          | 0.361          | 0.317          | 0.333 | 1.201           | 0.0195           |
| 7227261  | NMB1998  | autotransporter MspA (AusI)                                       | outer membrane             | 1.009          | 1.388          | 0.725          | 1.041  | 1.273          | 1.786          | 1.005          | 1.354 | 0.768           | 0.0176           |
| 7227016  | NMB1762  | TpsA2 activation/secretion protein TpsB2                          | outer membrane             | 0.542          | 0.674          | 0.441          | 0.552  | 0.877          | 0.962          | 0.950          | 0.930 | 0.594           | 0.0303           |
| 7225401  | NMB0182  | outer membrane protein Omp85. BamA                                | outer membrane             | 0.414          | 0.473          | 0.389          | 0.425  | 0.775          | 0.777          | 0.882          | 0.811 | 0.524           | 0.0205           |
| 7226786  | NMB1540  | lactoferrin binding protein LbpA                                  | outer membrane             | 0.317          | 0.241          | 0.152          | 0.237  | 0.565          | 0.437          | 0.471          | 0.491 | 0.482           | 0.0191           |
| 7227128  | NMB1870  | factor H binding protein fHbp                                     | outer membrane             | 0.789          | 0.933          | 0.720          | 0.814  | 1.530          | 2.134          | 1.443          | 1.703 | 0.478           | 0.0297           |
| 7227205  | NMB1946  | putative D-methionine-binding lipoprotein MetQ                    | outer membrane             | 0.493          | 0.536          | 0.483          | 0.504  | 0.383          | 0.412          | 0.443          | 0.413 | 1.221           | 0.0723           |
| 7225253  | NMB0033  | putative membrane-bound lytic murein transglycosylase A           | outer membrane             | 1.987          | 3.371          | 1.569          | 2.309  | 1.949          | 2.092          | 1.747          | 1.929 | 1.197           | 0.4909           |
| 7226110  | NMB0873  | outer-membrane lipoprotein LolB                                   | outer membrane             | 0.753          | 0.844          | 0.716          | 0.771  | 0.759          | 0.651          | 0.837          | 0.749 | 1.029           | 0.8341           |
| 66731938 | NMB1812  | type IV pilus secretin PilQ                                       | outer membrane             | 0.846          | 0.813          | 0.820          | 0.826  | 0.775          | 0.769          | 0.873          | 0.806 | 1.025           | 0.6426           |
| 7226550  | NMB1309  | type IV pilus biogenesis lipoprotein PilW                         | outer membrane             | 1.229          | 1.451          | 1.095          | 1.258  | 1.229          | 1.235          | 1.308          | 1.257 | 1.001           | 0.9952           |
| 7226969  | NMB1714  | multidrug efflux pump channel protein MtrE                        | outer membrane             | 1.053          | 1.036          | 1.085          | 1.058  | 0.996          | 1.025          | 1.176          | 1.066 | 0.993           | 0.8725           |
| 7227246  | NMB1985  | autotransporter App                                               | outer membrane             | 0.736          | 0.973          | 0.872          | 0.860  | 0.846          | 1.080          | 0.679          | 0.868 | 0.991           | 0.9451           |
| 7227390  | NMB2134  | conserved hypothetical outer-membrane protein                     | outer membrane             | 0.815          | 1.103          | 0.635          | 0.851  | 0.771          | 1.013          | 0.819          | 0.867 | 0.981           | 0.8632           |
| 7225719  | NMB0493  | haemagglutinin/hemolysin-related protein TpsA1                    | outer membrane             | 2.181          | 2.705          | 1.213          | 2.033  | 2.186          | 2.592          | 1.489          | 2.089 | 0.973           | 0.6749           |
| 7225888  | NMB0663  | outer membrane protein NspA                                       | outer membrane             | 2.018          | 2.902          | 1.559          | 2.160  | 2.119          | 3.387          | 1.511          | 2.339 | 0.923           | 0.3759           |
| 7225425  | NMB0204  | outer membrane protein assembly factor BamE                       | outer membrane             | 0.899          | 1.049          | 0.829          | 0.926  | 0.968          | 1.038          | 1.077          | 1.028 | 0.901           | 0.3138           |
| 7226294  | NMB1053  | class 5 outer membrane protein Opc                                | outer membrane             | 1.035          | 1.156          | 0.938          | 1.043  | 1.087          | 1.416          | 1.041          | 1.181 | 0.883           | 0.1586           |
| 7225691  | NMB0464  | putative phospholipase A1. pldA                                   | outer membrane             | 0.930          | 1.031          | 0.867          | 0.943  | 1.008          | 1.034          | 1.217          | 1.086 | 0.868           | 0.3066           |
| 7225505  | NMB0280  | LPS-assembly protein LptD                                         | outer membrane             | 0.507          | 0.580          | 0.445          | 0.511  | 0.569          | 0.605          | 0.656          | 0.610 | 0.837           | 0.2222           |
| 7225936  | NMB0707  | LPS-assembly lipoprotein LptE                                     | outer membrane             | 0.969          | 1.009          | 0.915          | 0.964  | 1.115          | 1.113          | 1.249          | 1.159 | 0.832           | 0.1105           |
| 7226576  | NMB1333  | putative metalloproteinase                                        | outer membrane             | 2.075          | 2.835          | 1.706          | 2.205  | 2.561          | 2.735          | 2.769          | 2.689 | 0.820           | 0.2865           |
| 7227250  | NMB1988  | TonB-dependent enterobactin receptor FetA (FrpB)                  | outer membrane             | 0.300          | 0.446          | 0.199          | 0.315  | 0.348          | 0.353          | 0.452          | 0.384 | 0.819           | 0.5619           |
| 7226921  | NMB1668  | hemoglobin receptor HmbR                                          | outer membrane             | 0.573          | 0.625          | 0.602          | 0.600  | 0.668          | 1.021          | 0.561          | 0.750 | 0.800           | 0.3646           |
| 7227256  | NMB1994  | NadA autotransporter                                              | outer membrane             | 0.110          | 0.112          | 0.118          | 0.113  | 0.134          | 0.122          | 0.172          | 0.143 | 0.795           | 0.1478           |
| 7226232  | NMB0992  | autotransporter NhHA                                              | outer membrane             | 0.982          | 1.509          | 1.062          | 1.184  | 1.368          | 1.055          | 2.068          | 1.497 | 0.791           | 0.5373           |
| 7227251  | NMB1989  | enterobactin uptake system binding lipoprotein FetB               | outer membrane             | 0.154          | 0.170          | 0.185          | 0.170  | 0.209          | 0.193          | 0.244          | 0.216 | 0.786           | 0.0553           |
| 7225265  | NMB0044  | peptide methionine sulfoxide reductase MrsAB                      | outer membrane             | 0.819          | 0.871          | 0.735          | 0.808  | 1.016          | 0.588          | 1.579          | 1.061 | 0.762           | 0.5196           |
| 7226452  | NMB1214  | haemagglutinin/hemolysin-related protein TpsA3                    | outer membrane             | 2.388          | 3.777          | 1.038          | 2.401  | 2.696          | 4.769          | 2.023          | 3.162 | 0.759           | 0.0784           |
| 7227022  | NMB1768  | haemagglutinin/hemolysin-related protein TpsA2                    | outer membrane             | 1.872          | 2.625          | 1.398          | 1.965  | 2.640          | 2.887          | 2.339          | 2.622 | 0.749           | 0.0843           |
| 7226739  | NMB1497  | TonB-dependent receptor                                           | outer membrane             | 0.736          | 0.634          | 0.863          | 0.744  | 0.968          | 1.059          | 1.005          | 1.011 | 0.736           | 0.0856           |
| 7225306  | NMB0088  | hypothetical outer membrane protein P1                            | outer membrane             | 0.692          | 0.795          | 0.664          | 0.717  | 0.846          | 1.227          | 0.851          | 0.974 | 0.735           | 0.0988           |
| 7226669  | NMB1429  | major outer-membrane protein PorA                                 | outer membrane             | 0.952          | 1.375          | 0.668          | 0.998  | 1.253          | 1.613          | 1.267          | 1.378 | 0.725           | 0.0760           |
| 7226992  | NMB1737  | putative TolC outer membrane protein                              | outer membrane             | 1.057          | 1.196          | 0.910          | 1.055  | 1.277          | 1.866          | 1.394          | 1.512 | 0.697           | 0.0726           |
| 7225928  | NMB0700  | IgA-specific serine endopeptidase                                 | outer membrane             | 1.084          | 1.839          | 0.626          | 1.183  | 1.625          | 1.681          | 1.792          | 1.699 | 0.696           | 0.3098           |

|          |         |                                                           |                          |       |       |       |       |       |        |       |       |       |        |
|----------|---------|-----------------------------------------------------------|--------------------------|-------|-------|-------|-------|-------|--------|-------|-------|-------|--------|
| 7227083  | NMB1829 | TonB-dependent receptor                                   | outer membrane           | 0.529 | 0.723 | 0.464 | 0.572 | 0.838 | -      | 0.964 | 0.901 | 0.635 | 0.1469 |
| 7225686  | NMB0460 | transferrin-binding protein 2 TbpB                        | outer membrane           | 0.304 | 0.402 | 0.227 | 0.311 | 0.581 | 0.500  | 0.719 | 0.600 | 0.518 | 0.1263 |
| 7225932  | NMB0703 | outer membrane protein assembly factor BamD (ComL)        | outer membrane           | 0.608 | 0.696 | 0.550 | 0.618 | -     | 0.950  | 1.149 | 1.049 | 0.589 | 0.2457 |
| 7227300  | NMB2039 | major outer-membrane protein PorB                         | outer membrane           | 0.824 | 1.134 | 0.573 | 0.844 | 1.332 | 1.559  | 1.462 | 1.451 | 0.582 | 0.0510 |
| 7226874  | NMB1623 | copper-containing nitrite reductase AniA                  | outer membrane           | 2.833 | 1.696 | 3.379 | 2.636 | 5.123 | 12.307 | 6.095 | 7.841 | 0.336 | 0.1942 |
| 7226708  | NMB1468 | conserved hypothetical lipoprotein                        | inner/outer membrane     | 0.577 | 0.589 | 0.659 | 0.608 | 0.241 | 0.286  | 0.267 | 0.265 | 2.299 | 0.0056 |
| 7226089  | NMB0853 | conserved hypothetical TPR-containing membrane protein    | inner/outer membrane     | 1.419 | 1.313 | 1.313 | 1.348 | 0.889 | 0.815  | 0.846 | 0.850 | 1.585 | 0.0013 |
| 7226450  | NMB1212 | hypothetical lipoprotein                                  | inner/outer membrane     | 1.004 | 1.277 | 0.853 | 1.045 | 1.403 | 1.761  | 1.353 | 1.506 | 0.694 | 0.0046 |
| 7227208  | NMB1949 | putative lytic murein transglycosylase                    | inner/outer membrane     | 2.119 | 2.250 | 2.033 | 2.134 | 1.221 | 1.374  | 1.394 | 1.330 | 1.605 | 0.0104 |
| 7226287  | NMB1047 | conserved hypothetical lipoprotein                        | inner/outer membrane     | 1.308 | 1.451 | 1.270 | 1.343 | 0.889 | 0.899  | 0.932 | 0.907 | 1.481 | 0.0198 |
| 7226322  | NMB1084 | hypothetical protein                                      | inner/outer membrane     | 0.308 | 0.308 | 0.318 | 0.311 | 0.209 | 0.193  | 0.258 | 0.220 | 1.414 | 0.0309 |
| 66731912 | NMB1592 | putative lipoprotein                                      | inner/outer membrane     | 1.040 | 1.040 | 1.152 | 1.077 | 0.794 | 0.718  | 0.995 | 0.836 | 1.288 | 0.0372 |
| 7227155  | NMB1898 | meningococcal lipoprotein Mlp                             | inner/outer membrane     | 0.247 | 0.254 | 0.265 | 0.256 | 0.542 | 0.458  | 0.697 | 0.565 | 0.452 | 0.0428 |
| 7226345  | NMB1107 | hypothetical lipoprotein                                  | inner/outer membrane     | 0.564 | 0.585 | 0.573 | 0.574 | 0.510 | 0.454  | 0.606 | 0.523 | 1.097 | 0.3962 |
| 7227396  | NMB2139 | conserved hypothetical lipoprotein                        | inner/outer membrane     | 1.855 | 2.179 | 1.768 | 1.934 | 1.806 | 2.046  | 1.674 | 1.842 | 1.050 | 0.0639 |
| 7226710  | NMB1470 | hypothetical lipoprotein                                  | inner/outer membrane     | 0.463 | 0.415 | 0.398 | 0.425 | 0.514 | 0.550  | 0.480 | 0.515 | 0.826 | 0.0679 |
| 7225304  | NMB0086 | hypothetical lipoprotein                                  | inner/outer membrane     | 0.344 | 0.344 | 0.332 | 0.340 | 0.324 | 0.378  | 0.602 | 0.435 | 0.781 | 0.3972 |
| 7226723  | NMB1483 | putative lipoprotein NlpD                                 | inner/outer membrane     | 0.396 | 0.464 | 0.365 | 0.409 | 0.530 | 0.441  | 0.688 | 0.553 | 0.739 | 0.2859 |
| 7225274  | NMB0054 | hypothetical lipoprotein                                  | inner/outer membrane     | 1.493 | 1.835 | -     | 1.664 | 2.300 | 2.248  | -     | 2.274 | 0.732 | 0.1988 |
| 7226275  | NMB1035 | hypothetical lipoprotein                                  | inner/outer membrane     | 0.643 | 0.634 | 0.711 | 0.663 | 0.870 | 1.118  | 0.810 | 0.932 | 0.711 | 0.1399 |
| 7226925  | NMB1672 | conserved hypothetical lipoprotein                        | inner/outer membrane     | 1.938 | 1.116 | 1.573 | 1.543 | 2.253 | 1.643  | 2.864 | 2.253 | 0.685 | 0.1387 |
| 7227404  | NMB2147 | conserved hypothetical lipoprotein                        | inner/outer membrane     | 2.211 | 2.513 | 1.991 | 2.238 | 3.174 | 3.122  | 3.579 | 3.292 | 0.680 | 0.0667 |
| 7226451  | NMB1213 | hypothetical lipoprotein                                  | inner/outer membrane     | 0.806 | 0.951 | 0.626 | 0.794 | 1.091 | 1.391  | -     | 1.241 | 0.640 | 0.1343 |
| 7226076  | NMB0841 | hypothetical integral membrane protein                    | inner/outer membrane     | 0.590 | 0.558 | 0.659 | 0.602 | 1.107 | 0.513  | 1.344 | 0.988 | 0.610 | 0.2231 |
| 7225255  | NMB0035 | Efem/EfeO family lipoprotein                              | inner/outer membrane     | 0.075 | 0.071 | 0.095 | 0.080 | 0.162 | 0.097  | 0.222 | 0.160 | 0.502 | 0.1145 |
| 7226269  | NMB1030 | Neisseria ubiquinone-8 binding protein NUbp               | periplasmic <sup>+</sup> | 1.405 | 1.469 | 1.564 | 1.479 | 0.285 | 0.340  | 0.308 | 0.311 | 4.759 | 0.0014 |
| 7225261  | NMB0041 | ABC transporter, periplasmic solute-binding protein       | periplasmic              | 0.890 | 0.888 | 0.915 | 0.898 | 0.206 | 0.227  | 0.240 | 0.224 | 4.006 | 0.0001 |
| 7225774  | NMB0548 | AcrA/AcrE family protein                                  | periplasmic              | 0.714 | 0.777 | 0.659 | 0.716 | 0.356 | -      | 0.294 | 0.325 | 2.205 | 0.0059 |
| 7225566  | NMB0345 | Peptidylprolyl isomerase                                  | periplasmic              | 0.661 | 0.683 | 0.668 | 0.671 | 0.300 | 0.261  | 0.367 | 0.309 | 2.170 | 0.0092 |
| 7226161  | NMB0923 | cytochrome c                                              | periplasmic              | 0.485 | 0.522 | 0.464 | 0.490 | 0.340 | 0.412  | 0.348 | 0.367 | 1.337 | 0.0072 |
| 7227218  | NMB1958 | putative thioredoxin                                      | periplasmic              | 0.366 | 0.424 | 0.379 | 0.390 | 0.281 | 0.349  | 0.281 | 0.303 | 1.285 | 0.0060 |
| 7226015  | NMB0783 | conserved hypothetical periplasmic protein                | periplasmic              | 1.784 | 1.763 | 2.052 | 1.867 | 0.474 | 0.622  | 0.443 | 0.513 | 3.637 | 0.0100 |
| 7227223  | NMB1963 | conserved hypothetical periplasmic protein                | periplasmic              | 1.480 | 1.161 | 1.213 | 1.285 | 0.395 | 0.454  | 0.416 | 0.422 | 3.046 | 0.0170 |
| 7226813  | NMB1565 | conserved hypothetical periplasmic protein                | periplasmic              | 1.128 | -     | 1.180 | 1.154 | 0.348 | -      | 0.434 | 0.391 | 2.950 | 0.0143 |
| 7225777  | NMB0550 | thiol:disulfide interchange lipoprotein DsbC              | periplasmic              | 3.018 | 2.393 | 2.469 | 2.627 | 0.945 | 0.975  | 0.792 | 0.904 | 2.906 | 0.0120 |
| 7225629  | NMB0407 | thiol:disulfide interchange protein DsbA3                 | periplasmic              | 1.176 | 0.987 | 1.308 | 1.157 | 0.451 | 0.454  | 0.525 | 0.476 | 2.428 | 0.0121 |
| 7225862  | NMB0634 | iron(III)-transport system iron-binding protein FbpB      | periplasmic              | 0.432 | 0.429 | 0.502 | 0.454 | 0.225 | 0.130  | 0.330 | 0.229 | 1.987 | 0.0268 |
| 7226518  | NMB1279 | membrane-bound lytic murein transglycosylase B            | periplasmic              | 1.322 | 1.237 | 1.550 | 1.369 | 0.771 | 0.782  | 0.846 | 0.799 | 1.713 | 0.0157 |
| 7225836  | NMB0606 | conserved hypothetical periplasmic protein                | periplasmic              | 0.960 | 0.942 | 0.882 | 0.928 | 0.593 | 0.756  | 0.643 | 0.664 | 1.398 | 0.0393 |
| 7225533  | NMB0313 | conserved hypothetical TPR-containing periplasmic protein | periplasmic              | 0.396 | 0.518 | 0.303 | 0.406 | 0.708 | 0.815  | 0.814 | 0.779 | 0.521 | 0.0326 |
| 7225815  | NMB0586 | putative ABC transporter substrate-binding protein        | periplasmic              | 0.489 | 0.188 | 0.758 | 0.478 | 0.209 | 0.227  | 0.240 | 0.225 | 2.122 | 0.2581 |
| 7226256  | NMB1017 | periplasmic sulfate-binding protein                       | periplasmic              | 0.035 | 0.031 | 0.043 | 0.036 | 0.028 | 0.017  | 0.018 | 0.021 | 1.744 | 0.0878 |
| 7227059  | NMB1805 | cytochrome c4                                             | periplasmic              | 1.070 | 0.808 | 1.313 | 1.064 | 0.668 | 0.668  | 0.579 | 0.638 | 1.666 | 0.1316 |
| 7225681  | NMB0456 | N-acetylmuramoyl-L-alanine amidase AmiC                   | periplasmic              | 2.115 | 3.924 | -     | 3.019 | 1.229 | 2.546  | -     | 1.888 | 1.599 | 0.1364 |
| 7226716  | NMB1475 | conserved hypothetical periplasmic protein                | periplasmic              | 0.361 | 0.045 | 0.730 | 0.379 | 0.253 | 0.176  | 0.376 | 0.268 | 1.411 | 0.5144 |
| 7227337  | NMB2074 | conserved hypothetical periplasmic protein                | periplasmic              | 0.304 | 0.759 | 0.536 | 0.533 | 0.340 | 0.429  | 0.403 | 0.390 | 1.365 | 0.3108 |
| 7225400  | NMB0181 | periplasmic chaperone Skp (OmpH)                          | periplasmic              | 2.432 | 2.076 | 2.341 | 2.283 | 1.889 | 1.878  | 1.828 | 1.865 | 1.224 | 0.0632 |
| 7226681  | NMB1440 | conserved hypothetical TPR-containing periplasmic protein | periplasmic              | 4.004 | 4.451 | 2.161 | 3.539 | 2.542 | 3.735  | 2.801 | 3.026 | 1.170 | 0.4923 |
| 7225577  | NMB0355 | Lipopolysaccharide export system protein LptA             | periplasmic              | 1.163 | 1.241 | 0.915 | 1.106 | 0.885 | 1.008  | 0.982 | 0.959 | 1.154 | 0.3056 |
| 7226109  | NMB0872 | conserved hypothetical TPR-containing periplasmic protein | periplasmic              | 2.370 | 3.455 | 1.668 | 2.498 | 1.941 | 1.706  | 2.887 | 2.178 | 1.147 | 0.7451 |
| 7225324  | NMB0109 | putative peptidoglycan-binding periplasmic protein        | periplasmic              | 0.912 | 1.170 | 0.872 | 0.985 | 0.830 | 0.782  | 1.059 | 0.890 | 1.106 | 0.6271 |

|          |         |                                                            |                  |       |       |       |       |       |       |       |       |       |        |
|----------|---------|------------------------------------------------------------|------------------|-------|-------|-------|-------|-------|-------|-------|-------|-------|--------|
| 7413435  | NMB0643 | MafB-related protein                                       | periplasmic      | 1.172 | 1.013 | 1.678 | 1.288 | 1.166 | 1.092 | 1.285 | 1.181 | 1.090 | 0.5396 |
| 66731926 | NMB0532 | protease DO (DegQ)                                         | periplasmic      | 1.203 | 0.857 | 1.261 | 1.107 | 1.115 | 1.025 | 1.059 | 1.066 | 1.038 | 0.7462 |
| 7226927  | NMB1674 | GDSL lipase family protein                                 | periplasmic      | 0.802 | 1.000 | 0.654 | 0.819 | 0.708 | 1.000 | 0.661 | 0.789 | 1.037 | 0.4644 |
| 7225689  | NMB0462 | periplasmic spermidine/putrescine-binding protein          | periplasmic      | 0.626 | 0.746 | 0.573 | 0.648 | 0.569 | 0.798 | 0.511 | 0.626 | 1.035 | 0.6171 |
| 7226084  | NMB0848 | conserved hypothetical periplasmic protein                 | periplasmic      | 1.198 | 1.259 | 1.047 | 1.168 | 1.036 | 0.777 | 1.620 | 1.144 | 1.021 | 0.9459 |
| 7225907  | NMB0680 | conserved hypothetical periplasmic protein                 | periplasmic      | 1.070 | 1.549 | 1.071 | 1.230 | 1.174 | 1.374 | 1.136 | 1.228 | 1.002 | 0.9809 |
| 7226804  | NMB1557 | conserved hypothetical periplasmic protein                 | periplasmic      | 0.916 | 0.839 | 1.095 | 0.950 | 0.877 | 1.172 | 0.864 | 0.971 | 0.978 | 0.9097 |
| 7226871  | NMB1620 | putative muramoyltetrapeptide carboxypeptidase             | periplasmic      | 4.000 | 4.844 | 3.199 | 4.014 | 3.644 | 5.332 | 3.955 | 4.310 | 0.931 | 0.4700 |
| 7226019  | NMB0787 | putative amino acid ABC transporter binding lipoprotein    | inner membrane   | 0.048 | 0.049 | 0.052 | 0.050 | 0.024 | 0.025 | 0.027 | 0.025 | 1.968 | 0.0002 |
| 7225402  | NMB0183 | Putative zinc metalloprotease                              | inner membrane   | 0.639 | 0.835 | 0.673 | 0.716 | 0.372 | 0.500 | 0.353 | 0.408 | 1.753 | 0.0044 |
| 7225558  | NMB0338 | conserved hypothetical integral membrane protein           | inner membrane   | 0.436 | 0.509 | 0.431 | 0.459 | 0.265 | 0.340 | 0.308 | 0.304 | 1.508 | 0.0099 |
| 7226862  | NMB1612 | putative amino acid-binding lipoprotein (HBP)              | inner membrane   | 0.700 | 0.768 | 0.678 | 0.715 | 0.545 | 0.651 | 0.561 | 0.586 | 1.221 | 0.0096 |
| 7225649  | NMB0426 | cell division protein FtsA                                 | inner membrane   | 0.916 | 1.813 | 2.237 | 1.655 | 1.818 | 2.933 | 3.362 | 2.704 | 0.612 | 0.0049 |
| 7225281  | NMB0060 | putative oligopeptide transporter                          | inner membrane   | 0.595 | 0.692 | 0.564 | 0.617 | 0.292 | 0.357 | 0.389 | 0.346 | 1.782 | 0.0310 |
| 7226843  | NMB1594 | putative spermidine/putrescine-binding lipoprotein         | inner membrane   | 1.608 | 1.951 | 1.460 | 1.673 | 0.905 | 1.046 | 0.891 | 0.948 | 1.765 | 0.0177 |
| 7226127  | NMB0889 | type IV pilus biogenesis protein PilK                      | inner membrane   | 1.097 | 1.339 | -     | 1.218 | 0.640 | 0.807 | 0.851 | 0.766 | 1.590 | 0.0488 |
| 7225302  | NMB0085 | sodium/glutamate symporter                                 | inner membrane   | 0.617 | 0.688 | 0.573 | 0.626 | 0.383 | 0.408 | 0.407 | 0.399 | 1.567 | 0.0206 |
| 7225854  | NMB0623 | putative spermidine/putrescine-binding lipoprotein         | inner membrane   | 0.269 | 0.259 | 0.270 | 0.266 | 0.158 | 0.155 | 0.204 | 0.172 | 1.543 | 0.0207 |
| 7226031  | NMB0798 | cell division protease FtsH                                | inner membrane   | 1.542 | 1.692 | 1.900 | 1.711 | 1.055 | 1.063 | 1.489 | 1.202 | 1.423 | 0.0153 |
| 7226763  | NMB1519 | thiol:disulfide interchange protein DsbD                   | inner membrane   | 0.361 | 0.433 | 0.464 | 0.420 | 0.285 | 0.315 | 0.321 | 0.307 | 1.367 | 0.0284 |
| 7226971  | NMB1716 | membrane fusion protein mtrC                               | inner membrane   | 0.441 | 0.478 | 0.427 | 0.448 | 0.312 | 0.345 | 0.344 | 0.334 | 1.344 | 0.0191 |
| 7226970  | NMB1715 | multiple transferable resistance system protein MtrD       | inner membrane   | 0.714 | 0.813 | 0.730 | 0.752 | 0.538 | 0.571 | 0.579 | 0.563 | 1.336 | 0.0196 |
| 7225628  | NMB0406 | putative cell division protein FtsN                        | inner membrane   | 0.529 | 0.567 | 0.550 | 0.548 | 0.419 | 0.445 | 0.466 | 0.443 | 1.237 | 0.0112 |
| 7227195  | NMB1937 | ATP-synthase F1. delta subunit                             | inner membrane   | 1.251 | 1.027 | -     | 1.139 | 1.134 | 0.899 | 0.738 | 0.924 | 1.233 | 0.0284 |
| 7227315  | NMB2053 | ubiquinol-cytochrome c reductase. iron-sulfur subunit      | inner membrane   | 0.573 | 1.000 | 0.431 | 0.668 | 1.206 | 1.450 | 1.199 | 1.285 | 0.520 | 0.0216 |
| 7225231  | NMB0006 | thioredoxin-related protein                                | inner membrane   | 1.295 | 1.201 | 1.431 | 1.309 | -     | 0.336 | 0.294 | 0.315 | 4.154 | 0.0861 |
| 7226538  | NMB1297 | membrane-bound lytic murein transglycosylase D             | inner membrane   | 2.203 | 3.040 | 2.299 | 2.514 | 1.233 | 0.782 | 2.041 | 1.352 | 1.860 | 0.1856 |
| 7225760  | NMB0535 | glucose/galactose transporter                              | inner membrane   | 1.000 | 0.670 | 0.654 | 0.775 | 0.451 | 0.597 | 0.452 | 0.500 | 1.549 | 0.1934 |
| 7225791  | NMB0564 | Na(+)-translocating NADH-quinone reductase. subunit F      | inner membrane   | 3.145 | 5.321 | 2.171 | 3.546 | 2.241 | 2.332 | 2.579 | 2.384 | 1.487 | 0.3612 |
| 7227164  | NMB1907 | Membrane protein insertase YidC (OxA)                      | inner membrane   | 0.692 | 0.746 | 0.735 | 0.724 | 0.565 | -     | 0.421 | 0.493 | 1.468 | 0.2562 |
| 7226203  | NMB0963 | phosphatidylserine decarboxylase precursor-related protein | inner membrane   | 0.811 | 0.768 | 0.540 | 0.706 | 0.447 | 0.676 | 0.403 | 0.509 | 1.389 | 0.1435 |
| 7225518  | NMB0294 | thiol:disulfide interchange lipoprotein DsbA2              | inner membrane** | 0.326 | 0.397 | 0.280 | 0.334 | 0.237 | 0.269 | 0.249 | 0.252 | 1.329 | 0.1003 |
| 66731937 | NMB1809 | type IV pilus biogenesis protein PilN                      | inner membrane   | 2.247 | 2.598 | 2.379 | 2.408 | 1.668 | 2.647 | 1.285 | 1.867 | 1.290 | 0.2431 |
| 7226478  | NMB1238 | peptidyl-prolyl cis-trans isomerase-related protein        | inner membrane   | 0.894 | 1.085 | 0.929 | 0.969 | 0.680 | 0.987 | 0.661 | 0.776 | 1.249 | 0.0618 |
| 7226590  | NMB1345 | hypothetical protein                                       | inner membrane   | 0.498 | 0.473 | 0.507 | 0.493 | 0.383 | 0.349 | 0.475 | 0.402 | 1.224 | 0.0911 |
| 7226734  | NMB1493 | carbon starvation protein A                                | inner membrane   | -     | 1.272 | 1.104 | 1.188 | 0.901 | 1.441 | 0.597 | 0.980 | 1.213 | 0.7047 |
| 7226057  | NMB0822 | heat shock protein HtpX                                    | inner membrane   | 0.207 | 0.228 | 0.185 | 0.207 | 0.162 | 0.185 | 0.172 | 0.173 | 1.194 | 0.0835 |
| 7225414  | NMB0194 | putative amino acid symporter                              | inner membrane   | 0.502 | 0.571 | -     | 0.537 | 0.415 | 0.433 | 0.516 | 0.455 | 1.181 | 0.1427 |
| 7227063  | NMB1810 | type IV pilus biogenesis protein PilO                      | inner membrane   | 2.771 | 2.076 | 2.460 | 2.436 | 1.968 | 2.933 | 1.303 | 2.068 | 1.178 | 0.6139 |
| 7226575  | NMB1332 | carboxy-terminal peptidase                                 | inner membrane   | 2.648 | 3.607 | 2.019 | 2.758 | 2.292 | 2.008 | 2.891 | 2.397 | 1.150 | 0.6635 |
| 7225840  | NMB0610 | spermidine/putrescine ABC transporter                      | inner membrane   | 0.674 | 0.737 | 0.630 | 0.680 | 0.522 | 0.676 | 0.584 | 0.594 | 1.145 | 0.1215 |
| 7227194  | NMB1936 | ATP synthase alpha chain                                   | inner membrane   | 1.683 | 1.750 | 1.711 | 1.715 | 1.407 | 1.731 | 1.430 | 1.523 | 1.126 | 0.1568 |
| 7225838  | NMB0608 | protein-export membrane protein SecF                       | inner membrane   | 0.630 | 0.670 | 0.412 | 0.571 | 0.462 | -     | 0.561 | 0.512 | 1.115 | 0.9623 |
| 7227193  | NMB1935 | ATP synthase F1. gamma subunit                             | inner membrane   | 1.581 | 1.946 | 1.758 | 1.762 | 1.462 | 1.819 | 1.502 | 1.595 | 1.105 | 0.0637 |
| 7225924  | NMB0996 | conserved hypothetical integral membrane protein           | inner membrane   | 1.317 | -     | 2.047 | 1.682 | 1.640 | 1.206 | 1.787 | 1.545 | 1.089 | 0.9314 |
| 7225598  | NMB0378 | putative phosphate permease                                | inner membrane   | 1.868 | 2.308 | 1.488 | 1.888 | 1.526 | 2.672 | 1.077 | 1.758 | 1.074 | 0.6528 |
| 7227192  | NMB1934 | ATP synthase F1. beta subunit                              | inner membrane   | 1.313 | 1.353 | 1.313 | 1.326 | 1.162 | 1.462 | 1.172 | 1.265 | 1.048 | 0.5499 |
| 7225837  | NMB0607 | protein-export membrane protein SecD                       | inner membrane   | 0.595 | 0.625 | 0.649 | 0.623 | 0.569 | 0.647 | 0.643 | 0.620 | 1.006 | 0.8282 |
| 7226009  | NMB0778 | putative heme biosynthesis protein HemX                    | inner membrane   | 0.392 | 0.473 | 0.355 | 0.407 | 0.494 | 0.458 | 0.294 | 0.415 | 0.980 | 0.8776 |
| 7227359  | NMB2096 | malate:quinone oxidoreductase                              | inner membrane   | 0.361 | 0.313 | 0.498 | 0.390 | 0.375 | 0.374 | 0.448 | 0.399 | 0.978 | 0.8127 |
| 7225562  | NMB0341 | TspA protein                                               | inner membrane   | 0.921 | 0.929 | 0.900 | 0.917 | 0.854 | 1.088 | 0.882 | 0.941 | 0.974 | 0.7526 |

|          |         |                                                        |                  |        |       |       |       |       |        |        |       |       |        |
|----------|---------|--------------------------------------------------------|------------------|--------|-------|-------|-------|-------|--------|--------|-------|-------|--------|
| 66731901 | NMB0601 | Sec-independent protein translocase protein TatA       | inner membrane   | 0.405  | 0.402 | 0.412 | 0.406 | 0.383 | 0.462  | 0.421  | 0.422 | 0.963 | 0.5812 |
| 7225769  | NMB0543 | putative L-lactate permease                            | inner membrane   | 0.295  | 0.406 | 0.275 | 0.325 | 0.296 | 0.387  | 0.357  | 0.347 | 0.938 | 0.5636 |
| 7225503  | NMB0278 | thiol:disulfide interchange lipoprotein DsbA1          | inner membrane** | 0.449  | 0.509 | 0.450 | 0.470 | 0.510 | 0.664  | 0.439  | 0.538 | 0.873 | 0.2931 |
| 7226781  | NMB1536 | preprotein translocase SecA subunit                    | inner membrane   | 1.714  | 1.446 | 1.521 | 1.560 | 1.731 | 1.206  | 2.715  | 1.884 | 0.828 | 0.5398 |
| 7226984  | NMB1729 | biopolymer transport protein ExbB                      | inner membrane   | 0.485  | 0.469 | -     | 0.477 | 0.478 | 0.504  | 0.810  | 0.597 | 0.798 | 0.6123 |
| 7227314  | NMB2052 | ubiquinol-cytochrome c reductase. cytochrome b         | inner membrane   | 0.793  | 0.951 | 0.801 | 0.848 | 0.830 | 1.408  | 0.995  | 1.078 | 0.787 | 0.2017 |
| 7225553  | NMB0333 | pilus assembly protein PilG                            | inner membrane   | 1.608  | 2.000 | 1.194 | 1.601 | 1.711 | -      | 2.439  | 2.075 | 0.771 | 0.4472 |
| 7226930  | NMB1677 | cytochrome c5                                          | inner membrane   | 0.894  | 0.732 | 0.829 | 0.819 | 0.980 | 1.303  | 0.914  | 1.066 | 0.768 | 0.2662 |
| 7226977  | NMB1723 | cytochrome c oxidase. subunit III                      | inner membrane   | 0.744  | 0.906 | 0.649 | 0.767 | 1.063 | -      | 1.059  | 1.061 | 0.723 | 0.0790 |
| 7227313  | NMB2051 | ubiquinol-cytochrome c reductase. cytochrome c1        | inner membrane   | -      | 1.031 | 0.682 | 0.857 | 1.083 | 1.542  | 1.050  | 1.225 | 0.700 | 0.1031 |
| 7226978  | NMB1724 | cytochrome c oxidase. subunit II                       | inner membrane   | 0.841  | 0.853 | 0.697 | 0.797 | 1.040 | 1.508  | 0.873  | 1.140 | 0.699 | 0.1590 |
| 7225608  | NMB0387 | phosphate permease PitA                                | inner membrane   | 3.163  | -     | 5.445 | 4.304 | 3.573 | 5.248  | 10.511 | 6.444 | 0.668 | 0.4486 |
| 7226802  | NMB1555 | long-chain-fatty-acid-CoA ligase                       | inner membrane   | 2.480  | 2.442 | 2.611 | 2.511 | 3.514 | 3.479  | 5.557  | 4.183 | 0.600 | 0.1195 |
| 7226444  | NMB1207 | bacterioferritin A                                     | cytoplasmic      | 0.617  | 0.679 | 0.626 | 0.640 | 0.352 | 0.433  | 0.380  | 0.388 | 1.649 | 0.0007 |
| 7226443  | NMB1206 | bacterioferritin B                                     | cytoplasmic      | 0.551  | 0.625 | 0.583 | 0.586 | 0.316 | 0.420  | 0.339  | 0.359 | 1.635 | 0.0026 |
| 7227093  | NMB1838 | Ribosome-binding ATPase YchF                           | cytoplasmic      | -      | 1.286 | 0.787 | 1.036 | 1.150 | 1.744  | 1.235  | 1.376 | 0.753 | 0.0066 |
| 7226965  | NMB1710 | NADP-specific glutamate dehydrogenase                  | cytoplasmic      | 0.132  | 0.129 | 0.175 | 0.146 | 0.182 | 0.185  | 0.231  | 0.199 | 0.731 | 0.0013 |
| 7226853  | NMB1604 | gpmA. phosphoglycerate mutase                          | cytoplasmic      | 0.956  | 1.179 | 0.791 | 0.975 | 1.909 | 2.412  | 1.833  | 2.051 | 0.476 | 0.0059 |
| 7226158  | NMB0920 | isocitrate dehydrogenase. NADP-dependent               | cytoplasmic      | 0.366  | 0.384 | 0.318 | 0.356 | 0.190 | 0.197  | 0.226  | 0.204 | 1.740 | 0.0375 |
| 7225429  | NMB0207 | glyceraldehyde 3-phosphate dehydrogenase               | cytoplasmic      | 6.921  | 8.844 | 9.137 | 8.301 | 4.605 | 5.496  | 5.145  | 5.082 | 1.633 | 0.0222 |
| 7226624  | NMB1384 | DNA gyrase subunit A                                   | cytoplasmic      | 0.885  | 0.839 | 1.047 | 0.924 | 0.648 | 0.458  | 0.774  | 0.627 | 1.475 | 0.0205 |
| 7225988  | NMB0758 | polyribonucleotide nucleotidyltransferase              | cytoplasmic      | 0.934  | 0.875 | 0.886 | 0.898 | 0.601 | 0.681  | 0.548  | 0.610 | 1.474 | 0.0257 |
| 7225344  | NMB0127 | 50S ribosomal protein L11                              | cytoplasmic      | 0.846  | 0.696 | 0.853 | 0.798 | 0.514 | 0.479  | 0.638  | 0.544 | 1.469 | 0.0222 |
| 7226562  | NMB1320 | 50S ribosomal protein L9                               | cytoplasmic      | 1.885  | 1.188 | 2.417 | 1.830 | 1.316 | 0.714  | 1.719  | 1.250 | 1.464 | 0.0123 |
| 7227094  | NMB1839 | formate-tetrahydrofolate ligase                        | cytoplasmic      | 0.824  | 0.942 | 0.754 | 0.840 | 0.518 | 0.756  | 0.475  | 0.583 | 1.440 | 0.0195 |
| 7226565  | NMB1323 | 30S ribosomal protein S6                               | cytoplasmic      | 0.938  | 0.804 | 1.047 | 0.930 | 0.692 | 0.651  | 0.742  | 0.695 | 1.338 | 0.0342 |
| 7225690  | NMB0463 | 30S ribosomal protein S20                              | cytoplasmic      | 1.097  | 1.054 | 1.066 | 1.072 | 0.794 | 0.891  | 0.796  | 0.827 | 1.296 | 0.0284 |
| 7227062  | NMB1808 | type IV pilus biogenesis protein PilM                  | cytoplasmic      | 3.388  | 3.938 | 3.341 | 3.555 | 2.443 | 3.416  | 2.683  | 2.847 | 1.249 | 0.0297 |
| 7226050  | NMB0815 | adenylosuccinate synthetase                            | cytoplasmic      | 0.436  | 0.504 | 0.455 | 0.465 | 0.502 | 0.559  | 0.552  | 0.538 | 0.865 | 0.0297 |
| 7226586  | NMB1342 | pyruvate dehydrogenase. E2 component                   | cytoplasmic      | 1.070  | 1.304 | 1.005 | 1.126 | 1.229 | 1.559  | 1.271  | 1.353 | 0.832 | 0.0220 |
| 7225946  | NMB0720 | threonyl-tRNA synthetase                               | cytoplasmic      | 6.837  | 5.991 | 6.024 | 6.284 | 7.715 | 7.294  | 7.891  | 7.634 | 0.823 | 0.0422 |
| 7225993  | NMB0763 | cysteine synthase A                                    | cytoplasmic      | 0.269  | 0.326 | 0.256 | 0.284 | 0.340 | 0.445  | 0.339  | 0.375 | 0.756 | 0.0242 |
| 7413480  | NMB2060 | glycerol-3-phosphate dehydrogenase (NAD+)              | cytoplasmic      | 0.383  | 0.487 | 0.379 | 0.416 | 0.545 | 0.571  | 0.570  | 0.562 | 0.740 | 0.0440 |
| 7226626  | NMB1388 | glucose-6-phosphate isomerase                          | cytoplasmic      | 3.436  | 3.531 | 3.469 | 3.479 | 5.130 | 4.870  | 4.538  | 4.846 | 0.718 | 0.0171 |
| 7226270  | NMB1031 | 3-isopropylmalate dehydrogenase                        | cytoplasmic      | 0.441  | 0.558 | 0.327 | 0.442 | 0.565 | 0.739  | 0.561  | 0.622 | 0.710 | 0.0294 |
| 7226859  | NMB1609 | O-succinylhomoserine sulfhydrylase (OSH sulfhydrylase) | cytoplasmic      | 2.330  | 2.598 | 2.346 | 2.425 | 3.344 | 3.916  | 3.308  | 3.523 | 0.688 | 0.0101 |
| 7225510  | NMB0286 | conserved hypothetical protein                         | cytoplasmic      | 0.308  | 0.397 | 0.294 | 0.333 | 0.447 | 0.643  | 0.462  | 0.517 | 0.644 | 0.0290 |
| 7226931  | NMB1678 | aromatic-amino-acid aminotransferase                   | cytoplasmic      | 0.339  | 0.330 | 0.308 | 0.326 | 0.490 | 0.492  | 0.543  | 0.508 | 0.641 | 0.0204 |
| 7226800  | NMB1554 | CTP synthase                                           | cytoplasmic      | 1.123  | 1.232 | 0.938 | 1.098 | 1.711 | 1.857  | 1.814  | 1.794 | 0.612 | 0.0165 |
| 7225468  | NMB0246 | NADH dehydrogenase I. F subunit                        | cytoplasmic      | 0.718  | 0.942 | 0.545 | 0.735 | 1.115 | 1.525  | 1.226  | 1.289 | 0.570 | 0.0220 |
| 7226806  | NMB1559 | glutathione synthetase                                 | cytoplasmic      | 0.313  | 0.357 | 0.237 | 0.302 | 0.474 | 0.626  | 0.511  | 0.537 | 0.563 | 0.0236 |
| 7226525  | NMB1285 | Enolase                                                | cytoplasmic      | 2.150  | 2.607 | 2.142 | 2.300 | 4.091 | 5.441  | 3.941  | 4.491 | 0.512 | 0.0212 |
| 7226313  | NMB1073 | putative carboxypeptidase                              | cytoplasmic      | 0.132  | 0.156 | 0.190 | 0.159 | 0.332 | 0.265  | 0.376  | 0.324 | 0.492 | 0.0285 |
| 7225307  | NMB0089 | pyruvate kinase                                        | cytoplasmic      | 2.577  | 5.152 | 3.668 | 3.799 | 6.490 | 10.874 | 6.281  | 7.882 | 0.482 | 0.0455 |
| 7227144  | NMB1885 | protein-L-isoaspartate O-methyltransferase             | cytoplasmic      | 0.379  | 1.000 | 0.223 | 0.534 | 1.249 | 2.248  | 0.959  | 1.485 | 0.359 | 0.0249 |
| 7225834  | NMB0604 | zinc containing alcohol dehydrogenase                  | cytoplasmic      | 0.308  | 0.455 | 0.223 | 0.329 | 0.850 | 1.248  | 0.805  | 0.968 | 0.340 | 0.0145 |
| 7413462  | NMB1379 | Cysteine desulfurase IscS (NifS protein homolog)       | cytoplasmic      | 1.207  | 1.045 | 1.474 | 1.242 | 4.877 | 4.181  | -      | 4.529 | 0.274 | 0.0499 |
| 7225370  | NMB0152 | 50S ribosomal protein L14                              | cytoplasmic      | 1.943  | 3.379 | 3.256 | 2.859 | 1.024 | 0.971  | 1.303  | 1.099 | 2.601 | 0.0574 |
| 7225385  | NMB0167 | 30S ribosomal protein S4                               | cytoplasmic      | 4.982  | 1.661 | 7.739 | 4.794 | 1.787 | 1.492  | 2.321  | 1.866 | 2.569 | 0.1942 |
| 7227088  | NMB1833 | isoleucyl-tRNA synthetase                              | cytoplasmic      | 10.850 | 6.563 | 4.445 | 7.286 | 5.123 | 2.651  | 1.964  | 3.246 | 2.245 | 0.0500 |
| 7225363  | NMB0145 | 50S ribosomal protein L2                               | cytoplasmic      | 2.018  | -     | 2.284 | 2.151 | 0.573 | -      | 1.448  | 1.011 | 2.129 | 0.1659 |
| 7225376  | NMB0158 | 50S ribosomal protein L18                              | cytoplasmic      | 1.423  | 0.634 | 1.479 | 1.179 | -     | 0.492  | 0.679  | 0.585 | 2.014 | 0.3879 |

|         |         |                                                                  |             |        |        |        |        |       |       |       |       |       |        |
|---------|---------|------------------------------------------------------------------|-------------|--------|--------|--------|--------|-------|-------|-------|-------|-------|--------|
| 7225384 | NMB0166 | 30S ribosomal protein S11                                        | cytoplasmic | 4.123  | 2.237  | 5.668  | 4.009  | -     | 1.672 | 2.344 | 2.008 | 1.997 | 0.3929 |
| 7226114 | NMB0876 | 50S ribosomal protein L25                                        | cytoplasmic | 1.053  | -      | 1.379  | 1.216  | 0.589 | 0.466 | 0.810 | 0.622 | 1.956 | 0.0646 |
| 7226541 | NMB1301 | 30S ribosomal protein S1                                         | cytoplasmic | 9.930  | 3.317  | 13.919 | 9.055  | 3.455 | 4.088 | 6.430 | 4.658 | 1.944 | 0.2330 |
| 7225361 | NMB0143 | 50S ribosomal protein L4                                         | cytoplasmic | 3.220  | 1.634  | 5.204  | 3.353  | 1.704 | 1.324 | 2.199 | 1.742 | 1.925 | 0.1747 |
| 7227364 | NMB2101 | 30S ribosomal protein S2                                         | cytoplasmic | 1.604  | 1.013  | 2.270  | 1.629  | 0.806 | 0.819 | 0.955 | 0.860 | 1.894 | 0.1410 |
| 7226223 | NMB0983 | bifunctional purine biosynthesis protein PurH                    | cytoplasmic | 8.542  | 5.165  | 4.213  | 5.973  | 3.628 | 0.887 | 4.995 | 3.170 | 1.884 | 0.2601 |
| 7227318 | NMB2056 | 30S ribosomal protein S9                                         | cytoplasmic | 2.062  | 1.022  | 2.863  | 1.982  | 1.032 | 0.824 | 1.321 | 1.059 | 1.872 | 0.1422 |
| 7225347 | NMB0130 | 30S ribosomal protein S7                                         | cytoplasmic | 1.225  | 0.656  | 1.592  | 1.158  | 0.680 | 0.479 | 0.747 | 0.635 | 1.823 | 0.1139 |
| 7225379 | NMB0161 | 50S ribosomal protein L15                                        | cytoplasmic | 4.189  | 1.688  | 4.204  | 3.360  | 1.170 | 2.685 | 1.860 | 1.905 | 1.764 | 0.3619 |
| 7225364 | NMB0146 | 30S ribosomal protein S19                                        | cytoplasmic | 0.811  | 0.513  | 1.014  | 0.779  | 0.458 | 0.475 | -     | 0.467 | 1.670 | 0.4305 |
| 7225366 | NMB0148 | 30S ribosomal protein S3                                         | cytoplasmic | 3.423  | 2.210  | 5.062  | 3.565  | 1.858 | 2.097 | 2.462 | 2.139 | 1.667 | 0.1866 |
| 7225375 | NMB0157 | 50S ribosomal protein L6                                         | cytoplasmic | 0.921  | 0.710  | 1.621  | 1.084  | 0.609 | 0.567 | 0.783 | 0.653 | 1.660 | 0.1758 |
| 7225360 | NMB0142 | 50S ribosomal protein L3                                         | cytoplasmic | 1.220  | 0.946  | 1.882  | 1.349  | 0.755 | 0.811 | 0.905 | 0.824 | 1.638 | 0.1646 |
| 7227319 | NMB2057 | 50S ribosomal protein L13                                        | cytoplasmic | 1.128  | 0.875  | 1.379  | 1.127  | 0.719 | 0.660 | 0.742 | 0.707 | 1.594 | 0.0748 |
| 7225373 | NMB0155 | 30S ribosomal protein S14                                        | cytoplasmic | 1.626  | 0.964  | 2.427  | 1.672  | -     | 0.870 | 1.231 | 1.050 | 1.592 | 0.4498 |
| 7225819 | NMB0589 | 50s ribosomal protein L19                                        | cytoplasmic | 1.969  | 1.076  | 2.370  | 1.805  | 0.901 | 1.063 | 1.448 | 1.137 | 1.587 | 0.1805 |
| 7225372 | NMB0154 | 50S ribosomal protein L5                                         | cytoplasmic | 1.427  | 0.893  | 1.829  | 1.383  | 0.862 | 0.777 | 0.982 | 0.874 | 1.583 | 0.1393 |
| 7225417 | NMB0196 | ribonuclease E                                                   | cytoplasmic | 3.432  | 2.804  | 4.422  | 3.552  | 2.051 | 2.601 | 2.136 | 2.263 | 1.570 | 0.1659 |
| 7225950 | NMB0723 | 50S ribosomal protein L20                                        | cytoplasmic | 0.841  | 0.754  | 0.910  | 0.835  | 0.518 | 0.592 | 0.493 | 0.534 | 1.563 | 0.0561 |
| 7225355 | NMB0137 | 30S ribosomal protein S7                                         | cytoplasmic | 1.110  | 0.906  | 2.190  | 1.402  | 0.941 | 0.529 | 1.276 | 0.915 | 1.532 | 0.1594 |
| 7225387 | NMB0169 | 50S ribosomal protein L17                                        | cytoplasmic | 0.714  | 0.589  | 0.853  | 0.719  | 0.490 | 0.538 | 0.457 | 0.495 | 1.452 | 0.1535 |
| 7225377 | NMB0159 | 30s ribosomal protein S5                                         | cytoplasmic | 0.960  | 0.772  | 1.403  | 1.045  | 0.688 | 0.702 | 0.801 | 0.730 | 1.432 | 0.1788 |
| 7225358 | NMB0140 | 30S ribosomal protein S10                                        | cytoplasmic | 0.987  | 0.804  | 1.028  | 0.940  | 0.676 | 0.710 | 0.611 | 0.666 | 1.412 | 0.1028 |
| 7225266 | NMB0045 | Signal recognition particle receptor FtsY                        | cytoplasmic | 3.665  | 5.455  | 2.829  | 3.983  | 3.451 | 2.349 | 2.796 | 2.865 | 1.390 | 0.3781 |
| 7226277 | NMB1037 | glutamate-cysteine ligase                                        | cytoplasmic | 0.626  | 0.201  | 0.318  | 0.381  | 0.253 | 0.244 | 0.344 | 0.280 | 1.361 | 0.5340 |
| 7225345 | NMB0128 | 50S ribosomal protein L1                                         | cytoplasmic | 0.687  | 0.563  | 0.844  | 0.698  | 0.486 | 0.508 | 0.566 | 0.520 | 1.342 | 0.1137 |
| 7227356 | NMB2094 | conserved hypothetical protein                                   | cytoplasmic | 0.727  | 0.674  | 0.787  | 0.729  | 0.502 | 0.588 | 0.548 | 0.546 | 1.336 | 0.0644 |
| 7225362 | NMB0144 | 50S ribosomal protein L23                                        | cytoplasmic | 0.762  | 0.567  | -      | 0.665  | 0.462 | 0.479 | 0.579 | 0.507 | 1.311 | 0.3182 |
| 7225839 | NMB0609 | 30s ribosomal protein S15                                        | cytoplasmic | 0.833  | 0.759  | 1.047  | 0.880  | 0.617 | 0.735 | 0.692 | 0.681 | 1.291 | 0.1752 |
| 7225772 | NMB0546 | alcohol dehydrogenase. propanol-preferring                       | cytoplasmic | 11.780 | 13.241 | 5.829  | 10.283 | 6.474 | 9.462 | 8.575 | 8.170 | 1.259 | 0.4822 |
| 7226295 | NMB1055 | serine hydroxymethyltransferase                                  | cytoplasmic | 5.220  | 5.147  | 4.517  | 4.961  | 3.771 | 3.681 | 4.462 | 3.971 | 1.249 | 0.1684 |
| 7226189 | NMB0950 | succinate dehydrogenase. flavoprotein subunit                    | cytoplasmic | 1.581  | 2.286  | 1.488  | 1.785  | 1.538 | 1.227 | 1.656 | 1.474 | 1.211 | 0.4970 |
| 7226824 | NMB1576 | acetolactate synthase III. small subunit                         | cytoplasmic | 0.176  | 0.156  | -      | 0.166  | 0.138 | 0.092 | 0.186 | 0.139 | 1.198 | 0.1590 |
| 7225374 | NMB0156 | 30S ribosomal protein S8                                         | cytoplasmic | 2.154  | 1.420  | 1.725  | 1.766  | 1.557 | 1.403 | 1.475 | 1.479 | 1.195 | 0.2301 |
| 7225343 | NMB0126 | transcription antitermination protein NusG                       | cytoplasmic | 1.454  | 1.982  | -      | 1.718  | 1.300 | 2.076 | 1.005 | 1.460 | 1.177 | 0.8485 |
| 7225560 | NMB0340 | lactoylglutathione lyase                                         | cytoplasmic | 0.727  | 1.004  | -      | 0.866  | 0.692 | 0.739 | 0.783 | 0.738 | 1.173 | 0.4160 |
| 7225349 | NMB0132 | DNA-directed RNA polymerase. beta subunit                        | cytoplasmic | 2.568  | 2.652  | 2.573  | 2.598  | 1.980 | 2.899 | 1.824 | 2.234 | 1.163 | 0.3605 |
| 7225386 | NMB0168 | DNA-directed RNA polymerase. alpha subunit                       | cytoplasmic | 1.339  | 1.496  | 1.573  | 1.469  | 1.241 | 1.332 | 1.244 | 1.272 | 1.155 | 0.1033 |
| 7225859 | NMB0629 | hisA                                                             | cytoplasmic | 1.489  | 2.335  | 1.938  | 1.921  | 1.573 | 1.382 | 2.086 | 1.680 | 1.143 | 0.5699 |
| 7226822 | NMB1574 | ketol-acid reductoisomerase                                      | cytoplasmic | 0.269  | 0.281  | 0.280  | 0.277  | 0.233 | 0.286 | 0.208 | 0.242 | 1.141 | 0.2595 |
| 7226618 | NMB1372 | ATP-dependent Clp protease. ATP-binding subunit ClpX             | cytoplasmic | 4.850  | 7.143  | 5.038  | 5.677  | 6.352 | 3.576 | 5.018 | 4.982 | 1.140 | 0.6889 |
| 7226143 | NMB0906 | conserved hypothetical protein                                   | cytoplasmic | 0.137  | 0.205  | 0.185  | 0.176  | 0.123 | 0.269 | 0.072 | 0.155 | 1.136 | 0.7204 |
| 7227196 | NMB1938 | ATP synthase F0. B subunit                                       | cytoplasmic | 1.476  | 1.531  | 1.498  | 1.502  | 1.182 | 1.655 | 1.154 | 1.330 | 1.129 | 0.3679 |
| 7225866 | NMB0637 | argininosuccinate lyase                                          | cytoplasmic | 1.445  | 1.603  | 1.251  | 1.433  | 1.150 | 1.504 | 1.167 | 1.274 | 1.125 | 0.1444 |
| 7225351 | NMB0133 | DNA-directed RNA polymerase. beta' subunit                       | cytoplasmic | 2.643  | 2.862  | 2.464  | 2.656  | 2.217 | 2.983 | 1.914 | 2.372 | 1.120 | 0.3015 |
| 7225367 | NMB0149 | 50S ribosomal protein L16                                        | cytoplasmic | 0.427  | 0.406  | 0.493  | 0.442  | 0.352 | 0.429 | 0.416 | 0.399 | 1.108 | 0.3178 |
| 7225519 | NMB0295 | signal recognition particle protein (fifty-four homolog)         | cytoplasmic | 1.507  | 1.500  | 1.896  | 1.634  | 1.328 | 1.479 | 1.620 | 1.476 | 1.107 | 0.1664 |
| 7225356 | NMB0138 | elongation factor G (EF-G)                                       | cytoplasmic | 4.771  | 5.415  | 5.408  | 5.198  | 4.115 | 4.487 | 5.484 | 4.695 | 1.107 | 0.2359 |
| 7226938 | NMB1684 | seryl-tRNA synthetase                                            | cytoplasmic | 4.749  | 5.375  | 3.863  | 4.662  | 6.601 | -     | 1.851 | 4.226 | 1.103 | 0.9737 |
| 7226297 | NMB1057 | gamma-glutamyltranspeptidase                                     | cytoplasmic | 2.088  | 2.313  | 2.095  | 2.165  | 2.107 | 1.798 | 1.986 | 1.964 | 1.103 | 0.3369 |
| 7227117 | NMB1860 | biotin carboxyl carrier protein of acetyl-CoA carboxylase (BCCP) | cytoplasmic | 0.022  | 0.027  | 0.019  | 0.023  | 0.001 | 0.034 | 0.027 | 0.021 | 1.098 | 0.8525 |
| 7225825 | NMB0595 | DNA-binding response regulator                                   | cytoplasmic | 0.467  | 0.603  | -      | 0.535  | 0.478 | 0.412 | 0.579 | 0.490 | 1.092 | 0.5376 |

|         |         |                                                                      |             |        |       |       |       |       |       |       |       |       |        |
|---------|---------|----------------------------------------------------------------------|-------------|--------|-------|-------|-------|-------|-------|-------|-------|-------|--------|
| 7227209 | NMB1950 | 30S ribosomal protein S21                                            | cytoplasmic | 1.048  | 0.924 | -     | 0.986 | 0.842 | 1.004 | 0.869 | 0.905 | 1.090 | 0.7355 |
| 7227366 | NMB2103 | uridylate kinase                                                     | cytoplasmic | 0.718  | 0.830 | 0.621 | 0.723 | 0.664 | 0.534 | 0.824 | 0.674 | 1.073 | 0.7647 |
| 7226982 | NMB1727 | conserved hypothetical protein                                       | cytoplasmic | 0.802  | 0.848 | 0.550 | 0.733 | 0.660 | 0.521 | 0.878 | 0.686 | 1.068 | 0.8322 |
| 7226872 | NMB1621 | glutathione peroxidase                                               | cytoplasmic | 3.687  | 3.054 | -     | 3.370 | 3.838 | 2.563 | -     | 3.200 | 1.053 | 0.6898 |
| 7227259 | NMB1996 | phosphoribosylformylglycinamide synthase                             | cytoplasmic | 1.313  | 1.804 | 1.265 | 1.461 | 1.273 | 1.475 | 1.452 | 1.400 | 1.043 | 0.7242 |
| 7226831 | NMB1583 | imidazoleglycerol-phosphate dehydratase                              | cytoplasmic | 2.057  | 1.446 | 3.095 | 2.199 | 1.791 | 2.727 | 1.810 | 2.109 | 1.043 | 0.9146 |
| 7226632 | NMB1393 | phosphogluconate dehydratase                                         | cytoplasmic | 0.859  | 1.156 | 0.872 | 0.962 | 0.854 | 1.050 | 0.891 | 0.932 | 1.033 | 0.5083 |
| 7226237 | NMB0997 | D-lactate dehydrogenase                                              | cytoplasmic | 0.559  | 0.576 | 0.607 | 0.581 | 0.466 | 0.765 | 0.466 | 0.566 | 1.026 | 0.8978 |
| 7227132 | NMB1874 | orotate phosphoribosyltransferase                                    | cytoplasmic | 0.912  | 1.067 | -     | 0.989 | 0.866 | 0.987 | 1.041 | 0.965 | 1.026 | 0.1646 |
| 7226588 | NMB1344 | pyruvate dehydrogenase. E3 component                                 | cytoplasmic | 1.273  | 1.821 | 1.284 | 1.460 | 1.577 | 1.328 | 1.421 | 1.442 | 1.012 | 0.9483 |
| 7225259 | NMB0039 | putative HAD-superfamily hydrolase                                   | cytoplasmic | 1.233  | 2.214 | 1.104 | 1.517 | 1.372 | 1.832 | 1.317 | 1.507 | 1.007 | 0.9600 |
| 7226286 | NMB1046 | threonine synthase                                                   | cytoplasmic | 1.493  | 1.790 | 1.341 | 1.542 | 1.292 | 1.466 | 1.842 | 1.534 | 1.005 | 0.9777 |
| 7226845 | NMB1595 | alanyl-tRNA synthetase                                               | cytoplasmic | 3.828  | 3.607 | 4.147 | 3.861 | 3.648 | 2.739 | 5.362 | 3.917 | 0.986 | 0.9357 |
| 7225507 | NMB0281 | peptidyl-prolyl cis-trans isomerase                                  | cytoplasmic | 2.013  | 2.040 | 1.725 | 1.926 | 1.787 | 2.109 | 2.023 | 1.973 | 0.976 | 0.7876 |
| 7226827 | NMB1579 | ATP phosphoribosyltransferase                                        | cytoplasmic | 8.749  | 4.969 | 6.161 | 6.626 | 8.281 | 6.597 | 5.498 | 6.792 | 0.976 | 0.8425 |
| 7226197 | NMB0957 | 2-oxoglutarate dehydrogenase                                         | cytoplasmic | 0.264  | 0.286 | 0.232 | 0.261 | 0.233 | -     | 0.303 | 0.268 | 0.972 | 0.7631 |
| 7227341 | NMB2079 | aspartate-semialdehyde dehydrogenase                                 | cytoplasmic | 0.912  | 0.897 | 0.886 | 0.898 | 0.905 | 0.798 | 1.090 | 0.931 | 0.965 | 0.7496 |
| 7226182 | NMB0944 | 5-methyltetrahydropteroyltriglutamate-homocysteine methyltransferase | cytoplasmic | 2.683  | 3.808 | 2.114 | 2.868 | 2.755 | 3.122 | 3.113 | 2.997 | 0.957 | 0.8168 |
| 7225572 | NMB0351 | transaldolase                                                        | cytoplasmic | 0.185  | 0.219 | 0.152 | 0.185 | 0.178 | 0.172 | 0.235 | 0.195 | 0.949 | 0.8195 |
| 7226554 | NMB1313 | trigger factor                                                       | cytoplasmic | 1.075  | 0.924 | 1.237 | 1.079 | 1.024 | -     | 1.258 | 1.141 | 0.946 | 0.7474 |
| 7227316 | NMB2054 | GTP cyclohydrolase 1 type 2 homolog                                  | cytoplasmic | 1.115  | 1.121 | 1.109 | 1.115 | 1.103 | 1.097 | 1.344 | 1.181 | 0.944 | 0.5134 |
| 7225424 | NMB0203 | dihydrodipicolinate reductase                                        | cytoplasmic | 2.286  | 2.813 | 3.664 | 2.921 | 2.810 | 3.227 | 3.290 | 3.109 | 0.939 | 0.5743 |
| 7227170 | NMB1913 | fatty acid/phospholipid synthesis protein                            | cytoplasmic | 1.282  | 1.951 | 1.682 | 1.638 | 1.411 | 2.382 | 1.462 | 1.752 | 0.935 | 0.6091 |
| 7226519 | NMB1280 | very long chain acyl-CoA dehydrogenase-related protein               | cytoplasmic | 1.665  | 1.982 | 1.327 | 1.658 | 1.613 | 1.538 | 2.204 | 1.785 | 0.929 | 0.7772 |
| 7226438 | NMB1201 | IMP dehydrogenase                                                    | cytoplasmic | 0.529  | 0.679 | 0.427 | 0.545 | 0.526 | 0.790 | 0.448 | 0.588 | 0.926 | 0.3392 |
| 7226193 | NMB0954 | citrate synthase                                                     | cytoplasmic | 0.630  | 0.920 | 0.592 | 0.714 | 0.731 | 0.706 | 0.882 | 0.773 | 0.923 | 0.7262 |
| 7227233 | NMB1972 | chaperonin. 60 kDa                                                   | cytoplasmic | 0.361  | 0.375 | 0.374 | 0.370 | 0.375 | 0.517 | 0.326 | 0.406 | 0.912 | 0.5880 |
| 7225938 | NMB0711 | conserved hypothetical protein                                       | cytoplasmic | 0.379  | 0.442 | 0.346 | 0.389 | 0.411 | 0.471 | 0.407 | 0.430 | 0.905 | 0.0588 |
| 7225765 | NMB0540 | aspartate aminotransferase                                           | cytoplasmic | 0.714  | 1.411 | 0.682 | 0.936 | 0.870 | 1.311 | 0.932 | 1.038 | 0.902 | 0.4320 |
| 7227041 | NMB1787 | N-acetyl-gamma-glutamyl-phosphate reductase                          | cytoplasmic | 0.264  | 0.344 | 0.318 | 0.309 | 0.281 | 0.391 | 0.357 | 0.343 | 0.900 | 0.0656 |
| 7225383 | NMB0165 | 30S ribosomal protein S13                                            | cytoplasmic | 0.921  | 0.339 | 1.270 | 0.843 | 0.901 | -     | 0.977 | 0.939 | 0.898 | 0.4576 |
| 7226717 | NMB1476 | glutamate dehydrogenase. NAD-specific                                | cytoplasmic | 1.106  | 1.228 | 1.227 | 1.187 | 1.186 | 1.668 | 1.136 | 1.330 | 0.893 | 0.4583 |
| 7226435 | NMB1199 | GTP-binding protein TypA                                             | cytoplasmic | 10.128 | 5.737 | 7.270 | 7.712 | 8.277 | 8.563 | 9.240 | 8.693 | 0.887 | 0.5652 |
| 7226981 | NMB1726 | putative metalloproteinase                                           | cytoplasmic | 0.256  | 0.250 | 0.318 | 0.274 | -     | 0.252 | 0.367 | 0.309 | 0.887 | 0.4727 |
| 7226284 | NMB1044 | ferredoxin-NADP reductase                                            | cytoplasmic | 0.520  | 0.513 | 0.408 | 0.480 | 0.506 | 0.567 | 0.552 | 0.542 | 0.887 | 0.3122 |
| 7226630 | NMB1392 | glucose-6-phosphate 1-dehydrogenase                                  | cytoplasmic | 6.441  | 6.299 | 6.886 | 6.542 | 9.953 | 4.025 | 8.176 | 7.385 | 0.886 | 0.6666 |
| 7226309 | NMB1070 | 2-isopropylmalate synthase                                           | cytoplasmic | 2.903  | 0.813 | 2.171 | 1.962 | 1.787 | 2.269 | 2.706 | 2.254 | 0.871 | 0.7357 |
| 7227118 | NMB1861 | acetyl-CoA carboxylase. biotin carboxylase                           | cytoplasmic | 2.485  | 2.241 | 2.355 | 2.360 | 2.352 | 3.235 | 2.584 | 2.724 | 0.867 | 0.3884 |
| 7225956 | NMB0729 | integration host factor. alpha subunit                               | cytoplasmic | 0.982  | 0.768 | -     | 0.875 | 0.953 | 0.706 | 1.394 | 1.017 | 0.860 | 0.2146 |
| 7226762 | NMB1518 | acetate kinase                                                       | cytoplasmic | 1.696  | 1.826 | 1.332 | 1.618 | 1.783 | 2.004 | 1.878 | 1.888 | 0.857 | 0.1940 |
| 7226713 | NMB1472 | clpB protein                                                         | cytoplasmic | 0.423  | 0.362 | 0.540 | 0.442 | 0.684 | 0.349 | -     | 0.516 | 0.855 | 0.5314 |
| 7227365 | NMB2102 | elongation factor TS (EF-TS)                                         | cytoplasmic | 2.793  | 3.170 | 1.791 | 2.585 | 3.249 | 2.303 | 3.552 | 3.035 | 0.852 | 0.6133 |
| 7225436 | NMB0214 | oligopeptidase A                                                     | cytoplasmic | 1.256  | 1.504 | 1.118 | 1.293 | 1.439 | 1.647 | 1.557 | 1.547 | 0.835 | 0.1105 |
| 7226892 | NMB1642 | transcription elongation protein nusA                                | cytoplasmic | 2.352  | 2.799 | 2.365 | 2.505 | 2.838 | 2.908 | 3.294 | 3.013 | 0.832 | 0.1656 |
| 7226829 | NMB1581 | histidinol dehydrogenase                                             | cytoplasmic | 0.643  | 0.844 | 0.725 | 0.737 | 0.893 | 0.735 | 1.050 | 0.893 | 0.826 | 0.3649 |
| 7227228 | NMB1968 | aldehyde dehydrogenase A                                             | cytoplasmic | 0.344  | 0.397 | 0.322 | 0.354 | 0.423 | 0.345 | 0.520 | 0.429 | 0.826 | 0.4100 |
| 7225796 | NMB0569 | Na(+)-translocating NADH-quinone reductase. subunit A                | cytoplasmic | 1.872  | 1.205 | 7.829 | 3.636 | 3.791 | 5.046 | -     | 4.418 | 0.823 | 0.2051 |
| 7227212 | NMB1953 | stringent starvation protein A                                       | cytoplasmic | 2.330  | -     | 2.265 | 2.298 | 2.715 | -     | 2.873 | 2.794 | 0.822 | 0.1406 |
| 7226783 | NMB1538 | RNA polymerase sigma factor RpoD                                     | cytoplasmic | 3.167  | 3.272 | 3.223 | 3.221 | 3.364 | 5.676 | 2.715 | 3.918 | 0.822 | 0.5099 |
| 7226819 | NMB1572 | aconitate hydratase 2                                                | cytoplasmic | 3.489  | 5.268 | 2.701 | 3.819 | 4.004 | 3.101 | 6.914 | 4.673 | 0.817 | 0.6898 |
| 7226748 | NMB1505 | nicotinate phosphoribosyltransferase                                 | cytoplasmic | 0.427  | 0.455 | 0.408 | 0.430 | 0.486 | 0.630 | 0.484 | 0.534 | 0.806 | 0.1032 |
| 7226686 | NMB1445 | recA protein                                                         | cytoplasmic | 3.881  | 5.179 | 2.365 | 3.808 | 3.312 | 5.874 | 5.059 | 4.748 | 0.802 | 0.4266 |

|         |         |                                                                    |             |       |       |       |       |        |       |       |       |       |        |
|---------|---------|--------------------------------------------------------------------|-------------|-------|-------|-------|-------|--------|-------|-------|-------|-------|--------|
| 7225392 | NMB0174 | valyl-tRNA synthetase                                              | cytoplasmic | 3.291 | 5.402 | 3.171 | 3.954 | 4.806  | 4.042 | 6.068 | 4.972 | 0.795 | 0.5022 |
| 7226220 | NMB0990 | NAD(P) transhydrogenase. alpha subunit                             | cytoplasmic | 0.335 | 0.469 | -     | 0.402 | 0.553  | 0.416 | 0.557 | 0.509 | 0.790 | 0.6509 |
| 7225556 | NMB0336 | enoyl-(acyl-carrier-protein) reductase                             | cytoplasmic | 0.348 | 0.201 | 0.284 | 0.278 | 0.344  | -     | 0.367 | 0.355 | 0.782 | 0.5321 |
| 7227179 | NMB1921 | 3-oxoacyl-(acyl-carrier-protein) reductase                         | cytoplasmic | 0.692 | 1.138 | 0.545 | 0.792 | 0.889  | 1.139 | 1.018 | 1.015 | 0.780 | 0.2444 |
| 7225897 | NMB0671 | malate oxidoreductase (NAD)                                        | cytoplasmic | 0.211 | 0.353 | 0.190 | 0.251 | 0.289  | 0.374 | 0.317 | 0.326 | 0.770 | 0.1332 |
| 7226199 | NMB0959 | succinyl-CoA synthetase. beta subunit                              | cytoplasmic | 2.251 | 2.924 | 1.754 | 2.310 | 2.980  | 2.168 | 3.864 | 3.004 | 0.769 | 0.4897 |
| 7227050 | NMB1796 | putative oxidoreductase                                            | cytoplasmic | 1.101 | 1.567 | 0.924 | 1.197 | 1.613  | 1.160 | 1.905 | 1.559 | 0.768 | 0.4686 |
| 7225555 | NMB0335 | 2.3.4.5-tetrahydropyridine-2.6-dicarboxylate N-succinyltransferase | cytoplasmic | 0.194 | 0.277 | 0.123 | 0.198 | 0.261  | 0.197 | 0.317 | 0.258 | 0.766 | 0.5235 |
| 7226672 | NMB1432 | 3-phosphoshikimate 1-carboxyvinyltransferase                       | cytoplasmic | 3.965 | 6.647 | 4.152 | 4.921 | 7.162  | 8.403 | 4.104 | 6.556 | 0.751 | 0.2236 |
| 7225509 | NMB0284 | adenylosuccinate lyase                                             | cytoplasmic | 1.185 | 1.549 | 0.953 | 1.229 | 1.561  | 1.647 | 1.814 | 1.674 | 0.734 | 0.1842 |
| 7226749 | NMB1506 | arginyl-tRNA synthetase                                            | cytoplasmic | 3.498 | 2.330 | 3.559 | 3.129 | 2.526  | -     | 6.036 | 4.281 | 0.731 | 0.7381 |
| 7225547 | NMB0326 | octaprenyl-diphosphate synthase                                    | cytoplasmic | 0.670 | 1.080 | -     | 0.875 | 0.960  | 1.126 | 1.529 | 1.205 | 0.726 | 0.4008 |
| 7226194 | NMB0955 | 2-oxoglutarate dehydrogenase. E1 component                         | cytoplasmic | 1.150 | 2.152 | 3.303 | 2.202 | 2.810  | -     | 3.258 | 3.034 | 0.726 | 0.5174 |
| 7227154 | NMB1897 | leucyl-tRNA synthetase                                             | cytoplasmic | 0.617 | 0.804 | 0.474 | 0.631 | 0.802  | 0.874 | 0.937 | 0.871 | 0.725 | 0.1759 |
| 7226492 | NMB1252 | phosphoribosylformylglycinamide cyclo-ligase                       | cytoplasmic | 0.379 | 0.563 | 0.265 | 0.402 | 0.498  | 0.655 | 0.511 | 0.555 | 0.725 | 0.0838 |
| 7226467 | NMB1228 | homoserine dehydrogenase                                           | cytoplasmic | 1.493 | 1.621 | 1.104 | 1.406 | 1.996  | 1.324 | 2.511 | 1.944 | 0.723 | 0.3888 |
| 7225848 | NMB0618 | phosphoenolpyruvate synthase                                       | cytoplasmic | 0.467 | 0.518 | 0.441 | 0.475 | 0.573  | 0.832 | 0.570 | 0.658 | 0.722 | 0.1084 |
| 7226585 | NMB1341 | pyruvate dehydrogenase. E1 component                               | cytoplasmic | 0.304 | 0.295 | 0.327 | 0.309 | 0.391  | 0.521 | 0.376 | 0.429 | 0.719 | 0.1548 |
| 7227127 | NMB1869 | fructose-bisphosphate aldolase                                     | cytoplasmic | 3.617 | 6.308 | 3.185 | 4.370 | 5.249  | 6.718 | 6.683 | 6.217 | 0.703 | 0.1759 |
| 7226024 | NMB0791 | peptidyl-prolyl cis-trans isomerase                                | cytoplasmic | 4.300 | 5.317 | 2.038 | 3.885 | 4.130  | 5.542 | 7.000 | 5.557 | 0.699 | 0.4171 |
| 7226740 | NMB1498 | aspartokinase. alpha and beta subunits                             | cytoplasmic | 3.511 | 1.991 | 1.573 | 2.359 | -      | 0.849 | 5.937 | 3.393 | 0.695 | 0.6630 |
| 7227323 | NMB2061 | phosphoenolpyruvate carboxylase                                    | cytoplasmic | 1.308 | 1.205 | 1.341 | 1.285 | 1.763  | 1.466 | 2.371 | 1.867 | 0.688 | 0.1280 |
| 7227187 | NMB1930 | glycyl-tRNA synthetase. beta chain                                 | cytoplasmic | 3.599 | -     | 3.493 | 3.546 | 8.277  | 4.147 | 3.145 | 5.190 | 0.683 | 0.5473 |
| 7227385 | NMB2129 | argininosuccinate synthase                                         | cytoplasmic | 3.119 | 4.241 | 2.517 | 3.292 | 4.862  | 4.244 | 5.376 | 4.827 | 0.682 | 0.2061 |
| 7226702 | NMB1460 | single-strand binding protein                                      | cytoplasmic | 0.458 | 0.643 | 0.308 | 0.470 | 0.621  | 0.685 | 0.765 | 0.690 | 0.681 | 0.2155 |
| 7226531 | NMB1291 | ribonucleoside-diphosphate reductase. alpha subunit                | cytoplasmic | 0.855 | 0.978 | 0.512 | 0.781 | -      | 1.303 | 1.014 | 1.158 | 0.675 | 0.1342 |
| 7226628 | NMB1390 | glucokinase                                                        | cytoplasmic | 0.159 | 0.161 | 0.213 | 0.178 | 0.277  | 0.261 | 0.253 | 0.264 | 0.674 | 0.0674 |
| 7226063 | NMB0828 | ADP-L-glycero-D-mannoheptose-6-epimerase                           | cytoplasmic | 1.366 | -     | 1.261 | 1.313 | 2.028  | 1.803 | 2.077 | 1.969 | 0.667 | 0.0662 |
| 7227417 | NMB2159 | GAPDH                                                              | cytoplasmic | 2.150 | 2.214 | 2.171 | 2.178 | 2.822  | 4.752 | 2.339 | 3.305 | 0.659 | 0.2585 |
| 7226035 | NMB0802 | cystathionine gamma-synthase                                       | cytoplasmic | 1.079 | 1.022 | 1.175 | 1.092 | 1.407  | 1.882 | 1.715 | 1.668 | 0.655 | 0.0652 |
| 7226601 | NMB1356 | Glu-tRNA(Gln) amidotransferase. subunit A                          | cytoplasmic | 0.687 | 0.888 | 0.578 | 0.718 | 1.087  | 0.853 | 1.371 | 1.104 | 0.651 | 0.2482 |
| 7225581 | NMB0359 | glutamate-ammonia ligase                                           | cytoplasmic | 0.198 | 0.210 | 0.185 | 0.198 | 0.225  | 0.374 | 0.312 | 0.304 | 0.650 | 0.1221 |
| 7225441 | NMB0219 | 3-oxoacyl-(acyl-carrier-protein) synthase II                       | cytoplasmic | 5.427 | 5.214 | 5.322 | 5.321 | 8.182  | 9.786 | 6.638 | 8.202 | 0.649 | 0.0924 |
| 7226678 | NMB1437 | conserved hypothetical protein                                     | cytoplasmic | 1.278 | -     | 2.000 | 1.639 | 1.648  | -     | 3.416 | 2.532 | 0.647 | 0.3370 |
| 7225249 | NMB0030 | methionyl-tRNA synthetase                                          | cytoplasmic | 3.194 | 5.022 | 3.284 | 3.834 | 6.937  | -     | 5.100 | 6.018 | 0.637 | 0.2125 |
| 7226090 | NMB0854 | histidyl-tRNA synthetase                                           | cytoplasmic | 1.731 | 2.487 | 0.597 | 1.605 | 1.672  | 0.828 | 5.077 | 2.526 | 0.636 | 0.6663 |
| 7225544 | NMB0323 | UbiH family protein                                                | cytoplasmic | 3.661 | 1.719 | 2.412 | 2.597 | 4.494  | 3.702 | -     | 4.098 | 0.634 | 0.2467 |
| 7227157 | NMB1900 | polyphosphate kinase                                               | cytoplasmic | 0.273 | -     | 0.422 | 0.347 | 0.530  | 0.492 | 0.633 | 0.552 | 0.630 | 0.0608 |
| 7225780 | NMB0554 | dnaK protein                                                       | cytoplasmic | 0.872 | 0.763 | 0.877 | 0.837 | 1.269  | 1.088 | 1.643 | 1.333 | 0.628 | 0.0683 |
| 7227105 | NMB1849 | carbamoyl-phosphate synthase. small subunit                        | cytoplasmic | 1.119 | 1.036 | 0.896 | 1.017 | 1.660  | 1.235 | 1.964 | 1.620 | 0.628 | 0.1397 |
| 7227124 | NMB1867 | 1-deoxyxylulose-5-phosphate synthase                               | cytoplasmic | 3.573 | 2.598 | 2.773 | 2.981 | 6.486  | 3.450 | 4.489 | 4.808 | 0.620 | 0.0925 |
| 7226833 | NMB1584 | 3-hydroxyacid dehydrogenase                                        | cytoplasmic | 0.207 | 0.237 | 0.142 | 0.195 | 0.134  | 0.105 | 0.706 | 0.315 | 0.620 | 0.6442 |
| 7225695 | NMB0468 | biosynthetic arginine decarboxylase                                | cytoplasmic | 0.256 | 0.313 | 0.251 | 0.273 | 0.462  | 0.391 | 0.480 | 0.444 | 0.615 | 0.0675 |
| 7226186 | NMB0947 | dihydrolipoyl dehydrogenase                                        | cytoplasmic | -     | 0.286 | 0.190 | 0.238 | -      | 0.269 | 0.520 | 0.395 | 0.602 | 0.5323 |
| 7227111 | NMB1855 | carbamoyl-phosphate synthase. large subunit                        | cytoplasmic | 0.991 | 1.308 | 0.905 | 1.068 | 1.565  | 1.294 | 2.575 | 1.811 | 0.590 | 0.2709 |
| 7226583 | NMB1339 | prolyl-tRNA synthetase                                             | cytoplasmic | 4.969 | 4.973 | -     | 4.971 | 10.565 | 6.151 | 8.656 | 8.458 | 0.588 | 0.3679 |
| 7225235 | NMB0010 | phosphoglycerate kinase                                            | cytoplasmic | 2.115 | 2.339 | 2.152 | 2.202 | 3.134  | 4.996 | 3.163 | 3.764 | 0.585 | 0.1038 |
| 7226268 | NMB1029 | aspartate ammonia-lyase                                            | cytoplasmic | 0.916 | 1.040 | 1.223 | 1.060 | 1.779  | 1.223 | 2.443 | 1.815 | 0.584 | 0.1313 |
| 7226603 | NMB1358 | Glu-tRNA(Gln) amidotransferase. subunit B                          | cytoplasmic | 0.537 | 0.701 | 0.469 | 0.569 | 0.980  | 0.782 | 1.303 | 1.022 | 0.557 | 0.1730 |
| 7226034 | NMB0801 | delta-aminolevulinic acid dehydratase                              | cytoplasmic | 0.493 | 1.170 | 0.498 | 0.720 | 1.399  | 1.147 | 1.344 | 1.297 | 0.555 | 0.1946 |
| 7226668 | NMB1428 | putative metallopeptidase                                          | cytoplasmic | 0.145 | 0.205 | 0.147 | 0.166 | 0.304  | 0.214 | 0.398 | 0.306 | 0.543 | 0.1864 |
| 7227044 | NMB1789 | protein-export protein SecB                                        | cytoplasmic | 0.326 | 0.406 | 0.275 | 0.336 | 0.605  | 0.466 | 0.810 | 0.627 | 0.535 | 0.1678 |

|         |         |                                                            |                          |       |       |       |       |       |       |        |       |       |        |
|---------|---------|------------------------------------------------------------|--------------------------|-------|-------|-------|-------|-------|-------|--------|-------|-------|--------|
| 7226679 | NMB1438 | putative ferredoxin-like protein                           | cytoplasmic              | 1.366 | -     | 2.592 | 1.979 | 4.478 | -     | 2.986  | 3.732 | 0.530 | 0.4198 |
| 7225927 | NMB0699 | tryptophane synthase                                       | cytoplasmic              | 1.806 | 1.804 | 1.313 | 1.641 | 2.601 | 3.504 | 3.222  | 3.109 | 0.528 | 0.0502 |
| 7226698 | NMB1457 | transketolase                                              | cytoplasmic              | 0.414 | 0.531 | 0.308 | 0.418 | 0.822 | 0.727 | 1.036  | 0.862 | 0.485 | 0.1031 |
| 7225651 | NMB0427 | cell division protein FtsZ                                 | cytoplasmic              | 2.018 | 3.799 | 1.863 | 2.560 | 5.024 | 5.256 | 6.756  | 5.679 | 0.451 | 0.0882 |
| 7225623 | NMB0401 | proline dehydrogenase                                      | cytoplasmic              | -     | 0.826 | 1.100 | 0.963 | 1.794 | 1.601 | 3.027  | 2.141 | 0.450 | 0.2567 |
| 7226184 | NMB0946 | peroxiredoxin 2 family protein/glutaredoxin                | cytoplasmic              | 1.141 | 2.527 | 1.218 | 1.629 | 3.455 | 2.487 | 4.941  | 3.628 | 0.449 | 0.2101 |
| 7225240 | NMB0015 | 6-phosphogluconate dehydrogenase                           | cytoplasmic              | 3.498 | 2.786 | 1.412 | 2.565 | 5.696 | -     | 5.964  | 5.830 | 0.440 | 0.2136 |
| 7226200 | NMB0960 | succinyl-CoA synthetase, alpha subunit                     | cytoplasmic              | 1.577 | 2.058 | 1.512 | 1.716 | 3.573 | -     | 4.231  | 3.902 | 0.440 | 0.0969 |
| 7226680 | NMB1439 | phosphoribosylaminoimidazole carboxylase                   | cytoplasmic              | 0.101 | 0.183 | -     | 0.142 | 0.336 | 0.277 | 0.412  | 0.342 | 0.416 | 0.2568 |
| 7225861 | NMB0631 | putative phosphate acetyltransferase Pta                   | cytoplasmic              | 0.705 | -     | 0.517 | 0.611 | 1.411 | 1.336 | 1.683  | 1.477 | 0.414 | 0.1535 |
| 7225693 | NMB0466 | aspartyl-tRNA synthetase                                   | cytoplasmic              | 3.075 | 1.911 | 3.919 | 2.968 | 6.178 | -     | 8.348  | 7.263 | 0.409 | 0.1109 |
| 7225612 | NMB0390 | maltose phosphorylase                                      | cytoplasmic              | -     | 2.893 | 1.853 | 2.373 | 5.996 | 6.202 | 14.018 | 8.739 | 0.272 | 0.3309 |
| 7227269 | NMB2005 | glutamate N-acetyltransferase/amino-acid acetyltransferase | cytoplasmic              | 0.502 | -     | 0.502 | 0.502 | 1.498 | -     | 2.321  | 1.910 | 0.263 | 0.1811 |
| 7226839 | NMB1590 | alkyl hydroperoxide reductase AhpD                         | no prediction            | 0.846 | 0.799 | 0.834 | 0.826 | 0.470 | 0.504 | 0.416  | 0.464 | 1.782 | 0.0097 |
| 7225567 | NMB0346 | hypothetical protein                                       | no prediction            | 0.445 | 0.571 | 0.412 | 0.476 | 0.095 | 0.113 | 0.145  | 0.118 | 4.046 | 0.0228 |
| 7226903 | NMB1652 | conserved hypothetical protein                             | no prediction            | 0.326 | 0.406 | 0.303 | 0.345 | 0.387 | 0.437 | 0.376  | 0.400 | 0.863 | 0.0478 |
| 7225626 | NMB0404 | conserved hypothetical protein                             | no prediction            | 0.449 | 0.509 | 0.540 | 0.500 | 0.589 | 0.630 | 0.620  | 0.613 | 0.815 | 0.0236 |
| 7225329 | NMB0113 | conserved hypothetical protein                             | no prediction            | 1.273 | 1.143 | -     | 1.208 | 0.862 | 0.929 | -      | 0.895 | 1.350 | 0.1943 |
| 7226459 | NMB1220 | stomatin/Mec-2 family protein                              | divergent <sup>+++</sup> | 2.586 | 2.772 | 2.635 | 2.664 | 2.107 | 6.958 | 2.824  | 3.963 | 0.672 | 0.4668 |

\* according to Tettelin *et al.*. 2000

\*\* according to NeMeSys (Rusniok *et al.*. 2009), UniProt (The UniProt Consortium. 2015) or pSORTb (Yu *et al.*. 2010), respectively

+ according to (Donnarumma *et al.*. 2015)

\*\* according to (Tinsley *et al.*. 2004)

+++ divergent results by NeMeSys, UniProt and pSORTb

# Values were obtained as the signal ratio between the sample (*i.e.* protein preparation of MC58 grown at either 32°C or 37°C) and the corresponding internal control (*i.e.* protein preparation of metabolically <sup>15</sup>N-labeled MC58) which was added in equal amounts to each sample prior to sample preparation and measurement (see Materials and Methods). Values in A, B, or C represent the results of each of the three independent experiments for each protein.

## References:

Tettelin, *et al.* (2000) Complete genome sequence of *Neisseria meningitidis* serogroup B strain MC58. *Science* 287: 1809-1815.

Rusniok C. *et al.* (2009) NeMeSys: a biological resource for narrowing the gap between sequence and function in the human pathogen *Neisseria meningitidis*. *Genome biology* 10(10):R110. The UniProt Consortium (2015) UniProt: a hub for protein information. *Nucleic Acids Res.* 43: D204-12.

Yu NY. *et al.* (2010) PSORTb 3.0: improved protein subcellular localization prediction with refined localization subcategories and predictive capabilities for all prokaryotes. *Bioinformatics* 26(13):1608-1615.

Donnarumma *et al.* (2015) *Neisseria meningitidis* GNA1030 is a ubiquinone-8 binding protein. *FASEB J* 29(6): 2260-7

Tinsley *et al.* (2004) Three homologues, including two membrane-bound proteins, of the disulfide oxidoreductase DsbA in *Neisseria meningitidis*: effects on bacterial growth and biogenesis of functional type IV pili. *J Biol Chem* 279 (26): 27078-87



**Table S2:** *Neisseria meningitidis* strains used in this study

| Strain designation                 | Strain and genotype                         | Relevant phenotypic characteristic                                                       | Plasmid(s)                    | Resistance**       | Reference or source                           |
|------------------------------------|---------------------------------------------|------------------------------------------------------------------------------------------|-------------------------------|--------------------|-----------------------------------------------|
| WUE2135                            | MC58 (WT)                                   | B:15:P1.7,16-2:F1-5: ST-74, ST-32 complex                                                | -                             | -                  | provided by E.R. Moxon                        |
| WUE3240 (MC58cps <sup>-</sup> )    | MC58Δ <i>csb</i>                            | polysialyltransferase mutant, no capsule expression                                      | pGH15                         | CM                 | (Lappann <i>et al.</i> , 2006)                |
| WUE4939                            | MC58Δ <i>pile</i>                           | Deficient in pilin, unable to produce pilus                                              | pTL1-pilE-SmR                 | spec               | This study                                    |
| WUE4749                            | MC58Δ <i>pilT</i>                           | Deficient in pilT, unable to retract pilus, hyperpiliated                                | pTL1-pilT-SmR                 | spec               | This study                                    |
| WUE5013                            | MC58Δ <i>nalP</i>                           | Autotransporter protease NalP mutant                                                     | pDS2                          | kan                | This study                                    |
| WUE5014                            | MC58Δ <i>csb</i> Δ <i>nalP</i>              | Double mutant of polysialyltransferase and autotransporter protease NalP                 | pGH15, pDS2                   | CM, kan            | This study                                    |
| WUE5030                            | MC58Δ <i>nhbA</i>                           | Mutant of heparin binding protein NHBA                                                   | pDS6                          | kan                | This study                                    |
| WUE5031                            | MC58Δ <i>csb</i> Δ <i>nhbA</i>              | Double mutant of polysialyltransferase and heparin binding protein NHBA                  | pGH15, pDS6                   | CM, kan            | This study                                    |
| WUE5036                            | MC58ΔNMB1030                                | Mutant of hypothetical gene NMB1030                                                      | pDS7                          | ery                | This study                                    |
| WUE5037                            | MC58Δ <i>csb</i> ΔNMB1030                   | Double mutant of polysialyltransferase and hypothetical gene NMB1030                     | pGH15, pDS7                   | CM, ery            | This study                                    |
| WUE5042                            | MC58ΔNMB2095                                | Mutant of the Adhesin Complex Protein ACP (NMB2095)                                      | pDS8                          | ery                | This study                                    |
| WUE5043                            | MC58Δ <i>csb</i> ΔNMB2095                   | Double mutant of polysialyltransferase and Adhesin Complex Protein ACP (NMB2095)         | pGH15, pDS8                   | CM, ery            | This study                                    |
| WUE4833                            | MC58Δ <i>rpoE</i>                           | Mutant of the alternative Sigma factor E (NMB2144)                                       | pKB8                          | kan                | This study                                    |
| WUE5060                            | MC58Δ <i>csb</i> Δ <i>rpoE</i>              | Double mutant of polysialyltransferase and the alternative Sigma factor E (NMB2144)      | pEWHRE1.1, pKB8               | Kan, ery           | This study                                    |
|                                    | MC58Δ <i>mseR</i>                           | Mutant of the anti-Sigma E factor (NMB2145)                                              | pNMB1                         | kan                | This study                                    |
| WUE5071                            | MC58Δ <i>csb</i> Δ <i>mseR</i>              | Double mutant of polysialyltransferase and the anti-Sigma E factor (NMB2145)             | pGH15, pMB1                   | CM, kan            | This study                                    |
| WUE5053                            | MC58ΔNMB2091                                | Mutant of the Bam complex accessory factor NMB2091                                       | pDS10                         | kan                | This study                                    |
|                                    | MC58Δ <i>csb</i> ΔNMB2091                   | Double mutant of NMB2091 and polysialyltransferase                                       | pGH15, pDS10                  | CM, kan            | This study                                    |
| WUE4294                            | MC58Δ <i>csb</i> Δ <i>lst</i> Δ <i>fHbp</i> | Mutant of serogroup B strain α16 (ST-41) lacking <i>lst</i> , <i>csb</i> and <i>fHbp</i> | pMP1, pGH7, pMF32.35:T5       | kan, CM, spec      | as described in (Hubert <i>et al.</i> , 2012) |
| WUE4321                            | WUE4294 <i>hfq</i> <sup>+</sup>             | Overexpression mutant of <i>hfq</i> by transformation with plasmid pAB3                  | pMP1, pGH7, pMF32.35:T5, pAB3 | kan, CM, spec, ery | This study                                    |
| WUE4353                            | WUE4294 <i>fnr</i> <sup>+</sup>             | Overexpression mutant of <i>fnr</i> by transformation with plasmid pAB2                  | pMP1, pGH7, pMF32.35:T5, pAB2 | kan, CM, spec, ery | This study                                    |
| WUE4547                            | WUE4294 <i>rpoH</i> <sup>+</sup>            | Overexpression mutant of <i>rpoH</i> by transformation with plasmid pAB1                 | pMP1, pGH7, pMF32.35:T5, pAB1 | kan, CM, spec, ery | This study                                    |
| WUE5058                            | MC58Δ <i>csb</i> Δ <i>relA</i>              | Double mutant of polysialyltransferase and stringent response factor <i>relA</i>         | pKE1, pEWHRE1.1               | Kan, ery           | This study                                    |
|                                    | MC58Δ <i>csb</i> Δ <i>hfq</i>               | Double mutant of polysialyltransferase and RNA-chaperone <i>hfq</i>                      | pSS2, pEWHRE1.1               | CM, ery            | This study                                    |
| WUE5061                            | MC58Δ <i>csb</i> Δ <i>misR</i>              | Double mutant of polysialyltransferase and two-component sensor kinase                   | pLK3, pEWHRE1.1               | CM, ery            | This study                                    |
| WUE2668 (WUE2594cps <sup>-</sup> ) | A:4:P1.9:ST-5                               | capsule mutant of strain WUE2594                                                         | pNT5                          | CM                 | (Lappann <i>et al.</i> , 2006)                |
| WUE2517 (WUE2120cps <sup>-</sup> ) | C:NT:P1.5,2:F3-9:ST-11                      | capsule mutant of strain WUE2120                                                         | pHC10                         | CM                 | (Lappann <i>et al.</i> , 2006)                |
| WUE4511 (DE11340cps <sup>-</sup> ) | C:P1.5-1,10-8:F3-6:ST-11                    | capsule mutant of strain DE11340                                                         | pHC10                         | CM                 | (Lappann <i>et al.</i> , 2006)                |
| WUE3494 (α111cps <sup>-</sup> )    | Y:P1.5-2,10-1:F4-1:ST-23                    | capsule mutant of strain α111                                                            | pHC4Th                        | CM                 | (Lappann <i>et al.</i> , 2006)                |
| WUE3495 (α143cps <sup>-</sup> )    | Y:P1.5-2,10-1:F4-1:ST-23                    | capsule mutant of strain α143                                                            | pHC4Tu                        | CM                 | (Lappann <i>et al.</i> , 2006)                |
| α284                               | (B):P1.22-1,14:F3-3:ST-32                   | unencapsulated isolate, ST-32 complex                                                    | -                             | -                  | (Weber <i>et al.</i> , 2006)                  |

|                      |                                            |                                              |       |     |                          |
|----------------------|--------------------------------------------|----------------------------------------------|-------|-----|--------------------------|
| α376                 | (B):P1.5-1,10-1:F3-3:ST-32                 | unencapsulated isolate, ST-32 complex        | -     | -   | (Weber et al., 2006)     |
| α688                 | (C):P1.18-3,1:F5-2:ST-337                  | unencapsulated isolate, ST-41/44 complex     | -     | -   | (Weber et al., 2006)     |
| α822                 | (B):P1.18:F2-28:ST-957                     | unencapsulated isolate, ST-41/44 complex     | -     | -   | (Weber et al., 2006)     |
| α60                  | <i>cnf</i> :P1.7-36,30-2:F1-2:ST-53        | unencapsulated isolate, ST-53 complex        | -     | -   | (Claus et al., 2002)     |
| α225                 | <i>cnf</i> :P1.7,30-2:ST-53                | unencapsulated isolate, ST-53 complex        | -     | -   | (Claus et al., 2002)     |
| WUE3491<br>(α278cps) | E:P1.5,2-59:F1-7:ST-60                     | capsule mutant of strain α278, ST-60 complex | pNB10 | kan | (Lappann et al., 2006)   |
| WUE3492<br>(α378cps) | E:P1.5-2,12-59:ST-60                       | capsule mutant of strain α378, ST-60 complex | pNB10 | kan | (Lappann et al., 2006)   |
| α5                   | <i>cnf</i> :P1.18,25:ST-198                | unencapsulated isolate, ST-198 complex       | -     | -   | (Claus et al., 2002)     |
| α134                 | <i>cnf</i> :P1.18,25:F5-5:ST-198           | unencapsulated isolate, ST-198 complex       | -     | -   | (Claus et al., 2002)     |
| WUE5221              | Y92-1009<br>( <i>Neisseria lactamica</i> ) | ST-3493                                      | -     | -   | (Oliver et al., 2002)    |
| WUE5220              | 020-06<br>( <i>Neisseria lactamica</i> )   | ST-640                                       | -     | -   | (Bennett et al., 2005)   |
| WUE2136              | FA1090<br>( <i>Neisseria gonorrhoeae</i> ) | ST-1899                                      | -     | -   | (Nachamkin et al., 1981) |

\*ST, sequence type

\*\*CM, chloramphenicol; kan, kanamycin; ery, erythromycin; spec, spectinomycin

#### References:

- Bennett, J. S., D. T. Griffiths, N. D. McCarthy, K. L. Sleeman, K. A. Jolley, D. W. Crook & M. C. Maiden, (2005) Genetic diversity and carriage dynamics of *Neisseria lactamica* in infants. *Infection and immunity* **73**: 2424-2432.
- Claus, H., M. C. Maiden, R. Maag, M. Frosch & U. Vogel, (2002) Many carried meningococci lack the genes required for capsule synthesis and transport. *Microbiology* **148**: 1813-1819.
- Hubert, K., M. C. Pawlik, H. Claus, H. Jarva, S. Meri & U. Vogel, (2012) Opc expression, LPS immunotype switch and pilin conversion contribute to serum resistance of unencapsulated meningococci. *PloS one* **7**: e45132.
- Lappann, M., J. A. Haagensen, H. Claus, U. Vogel & S. Molin, (2006) Meningococcal biofilm formation: structure, development and phenotypes in a standardized continuous flow system. *Mol Microbiol* **62**: 1292-1309.
- Nachamkin, I., J. G. Cannon & R. S. Mittler, (1981) Monoclonal antibodies against *Neisseria gonorrhoeae*: production of antibodies directed against a strain-specific cell surface antigen. *Infection and immunity* **32**: 641-648.
- Oliver, K. J., K. M. Reddin, P. Bracegirdle, M. J. Hudson, R. Borrow, I. M. Feavers, A. Robinson, K. Cartwright & A. R. Gorrington, (2002) *Neisseria lactamica* protects against experimental meningococcal infection. *Infection and immunity* **70**: 3621-3626.
- Weber, M. V., H. Claus, M. C. Maiden, M. Frosch & U. Vogel, (2006) Genetic mechanisms for loss of encapsulation in polysialyltransferase-gene-positive meningococci isolated from healthy carriers. *International journal of medical microbiology* : *IJMM* **296**: 475-484.

**Table S3:** Primers used in this study

| Primer                           | Sequence (5'-3')*                 | Restriction site | Coordinates referring to NMB genome** |
|----------------------------------|-----------------------------------|------------------|---------------------------------------|
| <b>Cloning primers:</b>          |                                   |                  |                                       |
| <b>NMB1030 knock-out:</b>        |                                   |                  |                                       |
| NMB1030_up_F                     | gcgcgGATATCTACGTCGACAACGCCGCC     | EcoRV            | 1046176-1046159                       |
| NMB1030_up_R                     | gcgcgGAATTCGTGGGCCGGTAAAGCGC      | EcoRI            | 1045619-1045636                       |
| NMB1030_down_F                   | gcgcgGAATTCGCGAATCAGCACAAATGCCG   | EcoRI            | 1045031-1045012                       |
| NMB1030_down_R                   | gcgcgGGATCCTTGCTGTGCCGTCGCC       | BamHI            | 1044401-1044418                       |
| NMB1030_F                        | ACGCCCGTTTCGCCATCG                | -                | 1045515- 1045498                      |
| NMB1030_R                        | TGGGTGATGGTGGTGC                  | -                | 1045126- 1045143                      |
| <b>NMB2091 knock-out :</b>       |                                   |                  |                                       |
| NMB2091_up_F                     | gcgcgCGGCCCGCCGTACAGGCTGCCG       | NotI             | 2211294-2211308                       |
| NMB2091_up_R                     | gcgcgGGATCCGTCTCTCTTTTGGGC        | BamHI            | 2211859-2211842                       |
| NMB2091_down_F                   | gcgcgGGATCCCTCTACCAAAATCACGTCC    | BamHI            | 2212443-2212463                       |
| NMB2091_down_R                   | gcgcgGATAICTGTTTTCGGGGTGCC        | EcoRV            | 2213067-2213051                       |
| NMB2091_F                        | GCCATTTTCAGCCTTGCCC               | -                | 2211902- 2211920                      |
| NMB2091_R                        | TACGTTGCCGTAGGTAACG               | -                | 2212354- 2212336                      |
| <b>NMB2095 knock-out:</b>        |                                   |                  |                                       |
| NMB2095_up_F                     | gcgcgGATATCCAAACCTGAAACCGGACG     | EcoRV            | 2213921-2213939                       |
| NMB2095_up_R                     | gcgcgGAATTCGGAAATGAAAAATGTCGGGC   | EcoRI            | 2214421-2214401                       |
| NMB2095_down_F                   | gcgcgGAATTCATCAGGCAACAAAAACAGCG   | EcoRI            | 2214996-2215016                       |
| NMB2985_down_R                   | gcgcgGGATCCCGAGGCAACCCCGACG       | BamHI            | 2215518-2215501                       |
| NMB2095_F                        | CCGCAATCCTGTCTCCGC                | -                | 2214638- 2214656                      |
| NMB2095_R                        | GATTTGGTTGTCAGGTGCGG              | -                | 2214969- 2214950                      |
| <b>NMB2132 (NHBA) knock-out:</b> |                                   |                  |                                       |
| NMB2132_up_F                     | gcgcgGATATCGCGGCACACGCAAGG        | EcoRV            | 2240487-2240471                       |
| NMB2132_up_R                     | gcgcgGAATTCCTTCATCGTATTTCTTTGG    | EcoRI            | 2239952-2239973                       |
| NMB2132_down_F                   | gcgcgGAATTCCTGCTGAAGCAGGGCGC      | EcoRI            | 2238467-2238450                       |
| NMB2132_down_R                   | gcgcgCTAGAGTTGGCAATAAGCAATAAGG    | XbaI             | 2237884-2237904                       |
| NMB2132_F                        | TGCACCTGCGAATGGCGG                | -                | 2239364- 2239347                      |
| NMB2132_R                        | CGAATCCGCCCTTTCCGC                | -                | 2238508- 2238526                      |
| <b>NMB1969 knock-out:</b>        |                                   |                  |                                       |
| NMB1969_up_F                     | gcgcgACTAGTCCGAACAGACCTAGATCC     | SpeI             | 2060987-2061006                       |
| NMB1969_up_R                     | gcgcgGGATCCCTCTTGAATCTGACAAT      | BamHI            | 2061444-2061427                       |
| NMB1969_down_F                   | gcgcgGGATCCACAGCCGCAAAAGTACAGG    | BamHI            | 2064716-2064734                       |
| NMB1969_down_R                   | gcgcgCTCGAGGTTAATCCGTATAAAGACCG   | XhoI             | 2065355-2065335                       |
| NMB1969_F2                       | AAAATGCGCCGAGTACCC                | -                | 2063964- 2063982                      |
| NMB1969_R3                       | GCGTCCGTTACAGTCCGC                | -                | 2064491- 2064474                      |
| <b>NMB2145 knock-out:</b>        |                                   |                  |                                       |
| NMB2145_up_F                     | gcgcgCGGCCCGCACCCCTGATTTGGC       | NotI             | 2256935-2256950                       |
| NMB2145_up_R                     | gcgcgGGATCCGCCATTTTTTATAACG       | BamHI            | 2257456-2257442                       |
| NMB2145_down_F                   | gcgcgGGATCCCGGCATAAGCTGACGG       | BamHI            | 2257649-2257664                       |
| NMB2145_down_R                   | gcgcgGAGCTCGCGGAGGGAAGAGGC        | SacI             | 2258237-2258223                       |
| NMB2145_F                        | ATATCGCCCTGCTCTTTCC               | -                | 2257462-2257481                       |
| NMB2145_R                        | GAAGTTCTGGTTGTTTTGCC              | -                | 2257618-2257598                       |
| <b>NMB2144 knock-out:</b>        |                                   |                  |                                       |
| NMB2144_up(F)                    | gcgcgAAGCTTTGTATACCGAAACGCTGCAA   | HinDIII          | 2256228-2256249                       |
| NMB 2144_Up(R)                   | gcgcgGAATTCAGTATCGGGAACAAGGTAATTT | EcoRI            | 2256852-2256831                       |
| NMB 2144_Down(F)                 | gcgcgGAATTC ACGTTATGAAAAATGCCGC   | EcoRI            | 2257441- 2257460                      |
| NMB 2144_Down(R)                 | gcgcgGGATCCATCTTGAAAAATCATCAGAT   | BamHI            | 2258057-2258038                       |
| <b>NMB0052 (pilT) knock-out:</b> |                                   |                  |                                       |
| pilT fwd                         | gcgcgCTAGAACAAAGCATCCGACCTTCAC    | XbaI             | 57842-57862                           |
| pilT rev                         | gcgcgCTCGAGACCAGCGATTGCAGCGATT    | XhoI             | 56925-56943                           |
| pilT_AvrII_inv_fwd               | tgggtcCCTAGGTGCTGTCCGAATCGCTGAC   | AvrII            | 57116-57136                           |
| pilT_AvrII_inv_rev               | tgcggaCCTAGGCGCGTTGGCGAAGCTGAG    | AvrII            | 57336-57352                           |
| <b>NMB0018 (pilE) knock-out:</b> |                                   |                  |                                       |
| pilE fwd                         | gcgcgCTAGAGTACCAACAAGGCTGGATTC    | XbaI             | 18267-18286                           |
| pilE rev                         | gcgcgCTCGAGCGTTGCCTCGGCTTAGCTC    | XhoI             | 16656-16674                           |
| pilE_AvrII_inv_fwd               | gtaaaaCCTAGGTGCGGACAGCGGTTACG     | AvrII            | 17345-17353                           |
| pilE_AvrII_inv_rev               | tgttcCCTAGGATTCGCCGTGATTCAGG      | AvrII            | 17552-17568                           |
| <b>qPCR-primers:</b>             |                                   |                  |                                       |
| NMB2132-fwd                      | ATTGTGATGGGGAAGCGG                |                  | target: NMB2132 (NHBA)                |
| NMB2132-rev                      | CGCCTTTTGGCGTTCCG                 |                  | target: NMB2132 (NHBA)                |
| NMB1030-fwd                      | CACTCGCAGCCCGCC                   |                  | target: NMB1030                       |
| NMB1030-rev                      | CTTGGTGAACCTCGACGG                |                  | target: NMB1030                       |
| NMB2095-fwd                      | CACCGGACAGGTCGCCG                 |                  | target: NMB2095 (ACP)                 |
| NMB2095-rev                      | GTGGAGTTTGCCTGTTCCG               |                  | target: NMB2095 (ACP)                 |
| NMB1969-fwd                      | GCACCTATGAAGCAAGCG                |                  | target: NMB1969 (NalP)                |
| NMB1969-rev                      | GTACGCAGTTGTGCTTGC                |                  | target: NMB1969 (NalP)                |
| rpoE-fwd                         | ATACAGAGCAGGCGACAGTTTTCA          |                  | target: rpoE (sigma E)                |
| rpoE-rev                         | GCTTATCCAGTAGCTGTCATCCA           |                  | target: rpoE (sigma E)                |
| NMB1392 -fwd                     | CGTGCAGGAAATATCC                  |                  | target: zwf                           |
| NMB1392 -rev                     | TAGAAGGGAACCCCTCC                 |                  | target: zwf                           |

\*Restriction sites used for cloning of the PCR products are underlined. Small letters: 5'-extension of primers to ensure restriction.

\*\* (Tettelin *et al.*, 2000):

Tettelin, H., N. J. Saunders, J. Heidelberg, A. C. Jeffries, K. E. Nelson, J. A. Eisen, K. A. Ketchum, D. W. Hood, J. F. Peden, R. J. Dodson, W. C. Nelson, M. L. Gwinn, R. DeBoy, J. D. Peterson, E. K. Hickey, D. H. Haft, S. L. Salzberg, O. White, R. D. Fleischmann, B. A. Dougherty, T. Mason, A. Ciecko, D. S. Parksey, E. Blair, H. Cittone, E. B. Clark, M. D. Cotton, T. R. Utterback, H. Khouri, H. Qin, J. Vamathevan, J. Gill, V. Scarlato, V. Massignani, M. Pizza, G. Grandi, L. Sun, H. O. Smith, C. M. Fraser, E. R. Moxon, R. Rappuoli & J. C. Venter, (2000) Complete genome sequence of *Neisseria meningitidis* serogroup B strain MC58. *Science* **287**: 1809-1815.

**Table S4:** Plasmids used in this study

| plasmid              | description                                                                                                                                                                                                                                                         | origin                                                  |
|----------------------|---------------------------------------------------------------------------------------------------------------------------------------------------------------------------------------------------------------------------------------------------------------------|---------------------------------------------------------|
| pAB1                 | Plasmid for overexpression of <i>rpoH</i> under control of PorA promotor, containing erythromycin resistance cassette. A 873bp PCR fragment containing <i>rpoH</i> was introduced via <i>SpeI</i> and <i>EcoRV</i> into plasmid pAP1 (Lappann <i>et al.</i> , 2006) | This study                                              |
| pAB2                 | Plasmid for overexpression of <i>fmr</i> under control of PorA promotor, containing erythromycin resistance cassette. A 735bp PCR fragment containing <i>fmr</i> was introduced via <i>SpeI</i> and <i>EcoRV</i> into plasmid pAP1 (Lappann <i>et al.</i> , 2006)   | This study                                              |
| pAB3                 | Plasmid for overexpression of <i>hfq</i> under control of PorA promotor, containing erythromycin resistance cassette. A 294bp PCR fragment containing <i>hfq</i> was introduced via <i>SpeI</i> and <i>EcoRV</i> into plasmid pAP1 (Lappann <i>et al.</i> , 2006)   | This study                                              |
| pBluescript®II SK(+) | cloning vector                                                                                                                                                                                                                                                      | Stratagen                                               |
| pCR-XL-Erm1          | Vector comprising the gene encoding rRNA methyltransferase conferring erythromycin resistance cassette                                                                                                                                                              | This study                                              |
| pEWHRE1.1            | Replaces <i>siaB-D</i> with <i>rpsL</i> and erythromycin resistance cassette                                                                                                                                                                                        | (Unkmeir <i>et al.</i> , 2002, Johnston & Cannon, 1999) |
| pDS2                 | kanamycin resistance gene cloned between <i>nalP</i> (NMB1969) upstream and downstream regions                                                                                                                                                                      | This study                                              |
| pDS6                 | kanamycin resistance gene cloned between <i>NHBA</i> (NMB2132) upstream and downstream regions                                                                                                                                                                      | This study                                              |
| pDS7                 | erythromycin resistance gene cloned between NMB1030 upstream and downstream regions                                                                                                                                                                                 | This study                                              |
| pDS8                 | erythromycin resistance gene cloned between NMB2095 upstream and downstream regions                                                                                                                                                                                 | This study                                              |
| pDS10                | kanamycin resistance gene cloned between NMB2091 upstream and downstream regions                                                                                                                                                                                    | This study                                              |
| pKB8                 | kanamycin resistance gene cloned between <i>rpoE</i> (sigma-factor E; NMB2144) upstream and downstream regions                                                                                                                                                      | This study                                              |
| pKE1                 | kanamycin resistance gene cloned between <i>relA</i> (NMB1735) upstream and downstream regions                                                                                                                                                                      | This study                                              |
| pLK3                 | Chloramphenicol resistance cassette cloned between <i>misR</i> (NMB0595) upstream and downstream regions                                                                                                                                                            | This study                                              |
| pMB1                 | erythromycin resistance gene cloned between <i>mseR</i> (anti-Sigma factor E; NMB2145) upstream and downstream regions                                                                                                                                              | This study                                              |
| pSS2                 | Chloramphenicol resistance cassette cloned between <i>hfq</i> (NMB0748) upstream and downstream regions                                                                                                                                                             | This study                                              |
| pUC4K                | Vector containing an aminoglycoside 3'-phosphotransferase conferring resistance to kanamycin                                                                                                                                                                        | GE Healthcare                                           |
| pTL1-pilE-SmR        | disruption of <i>pilE</i> (NMB0018) by insertion of spectinomycin cassette via <i>AvrII</i> -mediated ligation; <i>AvrII</i> -site was introduced via inverse PCR into <i>pilE</i> -construct                                                                       | This study                                              |
| pTL1-pilT-SmR        | disruption of <i>pilT</i> (NMB0052) by insertion of spectinomycin cassette via <i>AvrII</i> -mediated ligation; <i>AvrII</i> -site was introduced via inverse PCR into <i>pilT</i> -construct                                                                       | This study                                              |

**References:**

- Johnston, D. M. & J. G. Cannon, (1999) Construction of mutant strains of *Neisseria gonorrhoeae* lacking new antibiotic resistance markers using a two gene cassette with positive and negative selection. *Gene* **236**: 179-184.
- Lappann, M., J. A. Haagensen, H. Claus, U. Vogel & S. Molin, (2006) Meningococcal biofilm formation: structure, development and phenotypes in a standardized continuous flow system. *Molecular microbiology* **62**: 1292-1309.
- Unkmeir, A., K. Latsch, G. Dietrich, E. Wintermeyer, B. Schinke, S. Schwender, K. S. Kim, M. Eigenthaler & M. Frosch, (2002) Fibronectin mediates Opc-dependent internalization of *Neisseria meningitidis* in human brain microvascular endothelial cells. *Molecular microbiology* **46**: 933-946.
